# To build a synapse: signaling pathways in neuromuscular junction assembly

Haitao Wu, Wen C. Xiong and Lin Mei\*

## Summary

Synapses, as fundamental units of the neural circuitry, enable complex behaviors. The neuromuscular junction (NMJ) is a synapse type that forms between motoneurons and skeletal muscle fibers and that exhibits a high degree of subcellular specialization. Aided by genetic techniques and suitable animal models, studies in the past decade have brought significant progress in identifying NMJ components and assembly mechanisms. This review highlights recent advances in the study of NMJ development, focusing on signaling pathways that are activated by diffusible cues, which shed light on synaptogenesis in the brain and contribute to a better understanding of muscular dystrophy.

**Key words:** Neural development, Neuromuscular junction, Retrograde signaling, Synapse formation

## Introduction

The brain contains billions of nerve cells, or neurons, which receive and integrate signals from the environment, and which govern the body's responses. Nervous system activity is made possible by synapses, contacts formed either between neurons or between a neuron and a target cell. Synapses are asymmetric structures in which neurotransmitter molecules are released from the presynaptic membrane and activate receptors on the postsynaptic membrane, thus establishing neuronal communication. As such, synapses are fundamental units of neural circuitry and enable complex behaviors. The neuromuscular junction (NMJ) is a type of synapse formed between motoneurons and skeletal muscle fibers. Large and easily accessed experimentally, this peripheral synapse has contributed greatly to the understanding of the general principles of synaptogenesis and to the development of potential therapeutic strategies for muscular disorders. The NMJ uses different neurotransmitters in different species; for example, acetylcholine (ACh) in vertebrates and glutamate in *Drosophila*, both of which are excitatory and cause muscle contraction. In *Caenorhabditis elegans*, there are two types of NMJs: at excitatory NMJs, ACh causes muscle contraction, whereas inhibitory NMJs release  $\gamma$ -aminobutyric acid (GABA) to cause muscle relaxation. Motor nerve terminals differentiate to form presynaptic active zones, where synaptic vesicles dock and release neurotransmitters. On the apposed postsynaptic membranes, neurotransmitter receptors are packed at high densities. Aided by genetic techniques and by the use of suitable animal models, including rodents, zebrafish, *Drosophila* and *C. elegans*, studies in the past decade have brought significant progress, not only in identifying components present in pre- and postsynaptic

membranes, but also in understanding the mechanisms that underpin NMJ assembly. This review highlights recent advances in the study of NMJ development, focusing on signaling pathways that are activated by diffusible cues from motor nerves and muscle fibers. Readers are referred to other outstanding reviews for a broad view of NMJ development (see Froehner, 1993; Hall and Sanes, 1993; Kummer et al., 2006; Salpeter and Loring, 1985; Schaeffer et al., 2001).

## NMJ formation

### A chicken-and-egg problem: motoneurons and muscle fibers

A fundamental riddle in NMJ assembly is whether the motoneurons or the muscle fibers determine where and how NMJs are formed. In mouse aneural muscle fibers, ACh receptors (AChRs) are initially evenly distributed and subsequently accumulate in the middle, where innervation occurs; this happens, for example, between embryonic day 12.5 (E12.5) and E13.5 in the diaphragm (Bevan and Steinbach, 1977; Braithwaite and Harris, 1979; Creazzo and Sohal, 1983; Ziskind-Conhaim and Bennett, 1982). In vitro studies of synapse formation indicated, however, that spinal neuron axons ignore such pre-existing, primitive AChR clusters on co-cultured muscle fibers and instead form synapses at new locations (Anderson and Cohen, 1977), which indicates a dominant role for motoneurons in determining where NMJs are formed. Careful in vivo studies revealed, however, that primitive AChR clusters are located in the central region of muscle fibers prior to the arrival of motoneuron axons (Lin et al., 2001; Yang et al., 2001) (Fig. 1A). This phenomenon, called prepatterning, appears to be nerve independent, as it also occurs in mutant mice that lack phrenic or motor nerves (Yang et al., 2000). At E13.5, nerve terminals overlap some, but not all, AChR clusters in the middle region of muscle fibers, and at E18.5 innervated clusters are enlarged, whereas primitive clusters have disappeared in both synaptic and extrasynaptic regions (Lin et al., 2001; Vock et al., 2008; Yang et al., 2001). These findings indicate that muscle fibers might play an active role in NMJ formation, and that some of the aneural, primitive AChR clusters are modified to form large, nerve-induced clusters (reviewed by Kummer et al., 2006) (Fig. 1A).

### Aneural AChR clusters mark axon guidance activity and agrin responsiveness

Recent studies challenge the importance of aneural AChR clusters for postsynaptic differentiation. When rodent embryonic diaphragms are cultured in vitro, primary myotubes form synapses in regions without aneural AChR clusters (Lin et al., 2008). Mouse embryos that lack a certain AChR subunit do not form aneural AChR clusters, but are able to form neural AChR clusters at later stages, although these are distributed more broadly (Liu et al., 2008). Studies of NMJ formation in zebrafish, a model system that allows aneural and neural AChR cluster formation to be separated genetically (Jing et al., 2009), reached similar conclusions. Zebrafish

Program of Developmental Neurobiology, Institute of Molecular Medicine and Genetics, Department of Neurology, Medical College of Georgia, Augusta, GA 30912, USA.

\*Author for correspondence (lmei@mcg.edu)

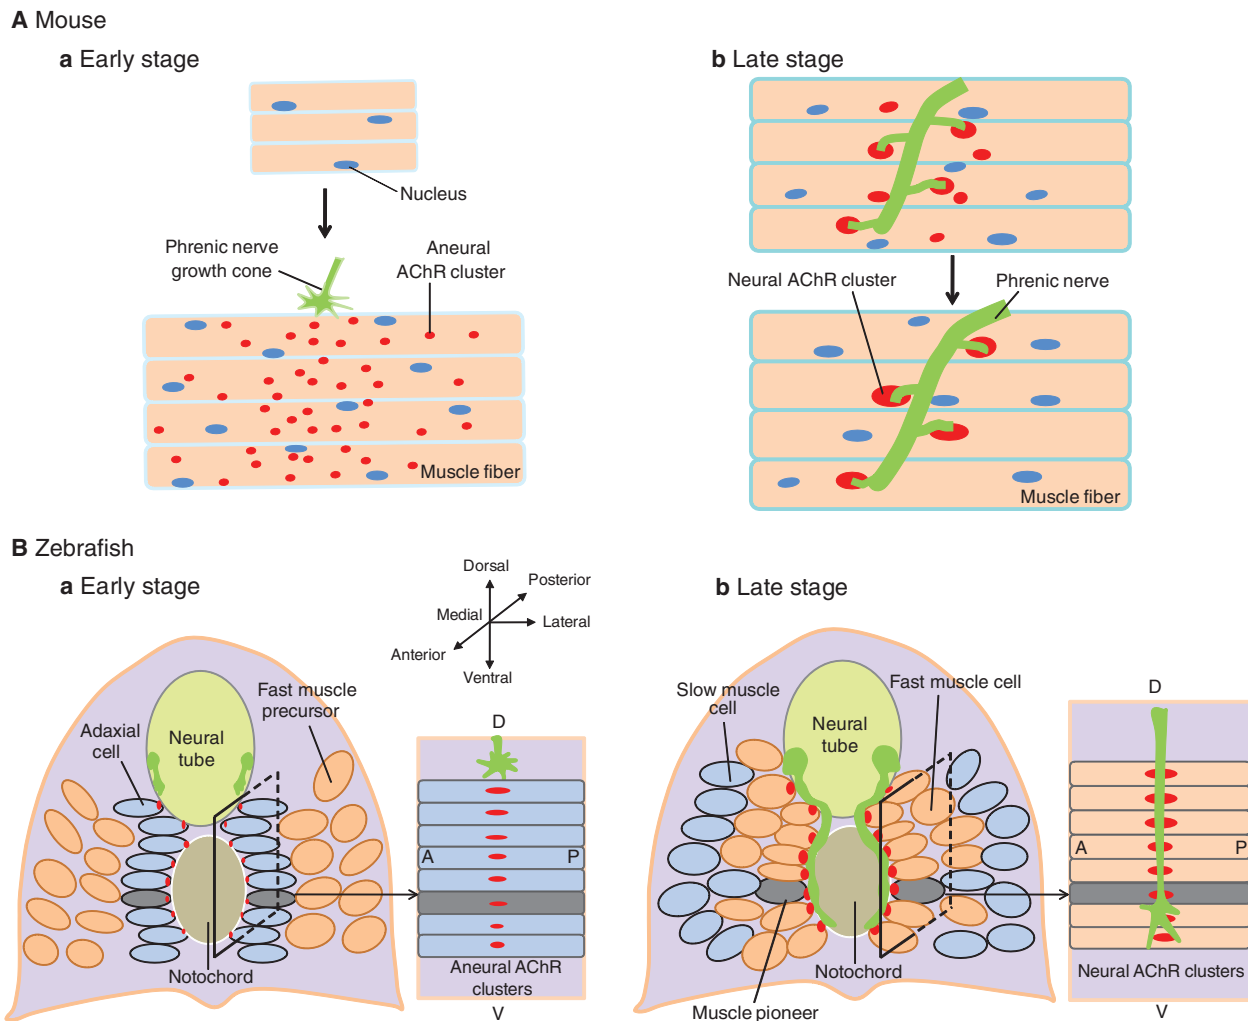

**Fig. 1. Neuromuscular synapse formation in vertebrates.** (A) In mice, muscle fibers of the diaphragm form primitive, aneural AChR clusters prior to the arrival of phrenic nerve terminals. The clusters are distributed in a broad, poorly defined region in the middle of muscle fibers, a phenomenon called prepatternning (a). Innervation leads to the appearance of large AChR clusters in the synaptic region and to the disappearance of primitive clusters in non-synaptic areas (b). (B) In zebrafish, adaxial, slow muscle cells form aneural AChR clusters on the medial surface prior to innervation (a). Subsequently, adaxial muscle cells migrate outwards, and their original position is filled with fast muscle cells that form nerve-induced AChR clusters where the aneural clusters used to be (b).

aneural clusters are formed on the medial surface of adaxial muscle cells prior to the arrival of motoneuron growth cones (Fig. 1B) (Flanagan-Steet et al., 2005; Panzer et al., 2005; Zhang et al., 2004). As growth cones arrive, adaxial muscle fibers migrate radially to the lateral surface and are replaced by fast muscle fibers. Motor axons innervate fast fibers to form neural clusters precisely where aneural clusters used to be. The muscle-specific receptor tyrosine kinase *Musk/unplugged* is required for both aneural and neural AChR cluster formation (Zhang et al., 2004). The induction of *Musk/unplugged* expression after prepatternning unexpectedly rescued neural AChR clusters on a null mutation background: zebrafish embryos formed normal NMJs and were fully motile (Jing et al., 2009). These observations suggest that NMJs can form in the absence of prepatterned AChRs. What, then, is the role of prepatternning? First, in *Musk*-null mutant (*Musk*<sup>-/-</sup>) mice and zebrafish, both of which lack aneural AChR clusters, nerve terminals stray from muscle fiber central regions (DeChiara et al., 1996; Jing et al., 2009; Lin et al., 2001; Yang et al., 2001; Zhang et al., 2004), suggesting a role for prepatternning in the confinement or

the guidance of motoneuron terminals to the center of muscle fibers. However, at least in zebrafish, this axon guidance activity apparently does not require aneural AChR clusters per se, because fish with mutations in the gene encoding rapsyn, an intracellular scaffold protein that interacts with and aggregates AChRs (Burden et al., 1983; Gautam et al., 1995; LaRoche and Froehner, 1986), lack prepatterned AChRs, but exhibit normal axon pathway finding (Zhang et al., 2004). Second, mouse embryonic diaphragms form AChR clusters confined to the central region in response to agrin, a motoneuron-derived factor (see below) (Lin et al., 2008), which suggests that the innervation of the central muscle region might result from a spatially restricted responsiveness to agrin. Thus, aneural AChR clusters seem to mark the middle region of muscle fibers, which itself is important for guiding motoneuron growth cones and for the responsiveness to neural agrin through as-yet unknown mechanisms.

It is worth noting that fundamental species differences exist in NMJ formation. For example, in rodents, primitive aneural and neural AChR clusters form on the same muscle fibers (Fig. 1A).

**Box 1. Ultrastructure of a mature rodent NMJ**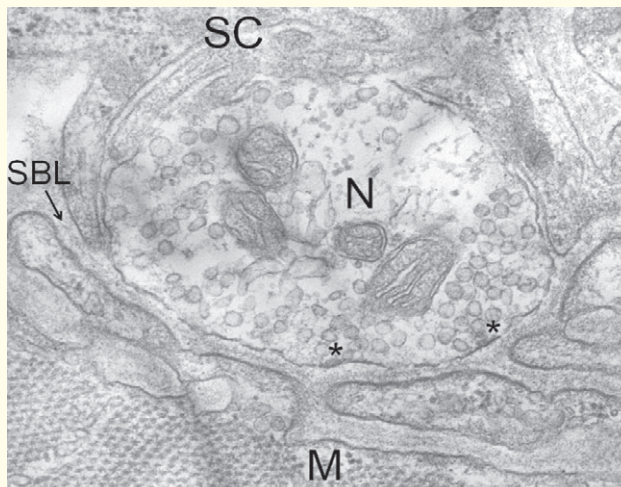

Electron micrograph of rodent NMJ that depicts three components of the synapse: nerve terminal (N), muscle fiber (M), and peripheral Schwann cells (SC). Muscle membranes fold up in the postjunctional region. AChR is concentrated at the tip of the junctional folds. Nerve terminals contain ACh-containing synaptic vesicles some of which are docked at active zones (\*) on the presynaptic membrane. Schwann cells insulate the synapse. SBL, synaptic basal lamina. (EM image courtesy of Dr J. Sanes, Harvard University, USA.)

Motor axons in mouse rapsyn mutants, unlike those in zebrafish, appear to be undifferentiated and grow extensively into non-synaptic regions (Gautam et al., 1995). Currently, no evidence for any pre-patterning or aneural receptor clustering exists in *Drosophila* or *C. elegans*. In *Drosophila*, motoneuron terminals seek out a target region for projection independently of the target cells, but target cell interactions are necessary for subsequent presynaptic differentiation (reviewed by Keshishian et al., 1996). In *C. elegans*, motoneuron axons form 'en passant' synapses with muscle arms (dendritic filopodium-like structures) that appear to look actively for presynaptic terminals, although presynaptic terminals might dictate instead where to form synapses (reviewed by Jorgensen and Nonet, 1995). Finally, in a single zebrafish muscle, some NMJs seem to form through aneural cluster incorporation, whereas others are formed de novo as pre-patterned clusters disappear (Flanagan-Steet et al., 2005; Panzer et al., 2005). These observations suggest that both motoneurons and muscle fibers are important in NMJ formation, but which component predominates might depend on the species and the developmental context.

**NMJ maturation**

In *Drosophila*, a muscle fiber can be innervated by two or more distinct axon terminals (Hoang and Chiba, 2001), whereas in *C. elegans* a muscle fiber receives inputs from both excitatory and inhibitory neurons (reviewed by Jorgensen and Nonet, 1995). In vertebrates, a muscle fiber might be transiently innervated by two or more motoneuron terminals at birth but, within two weeks, each muscle fiber becomes innervated by only one motor axon (reviewed by Lichtman and Colman, 2000). As the NMJ matures, the postsynaptic membrane invaginates to form junctional folds, and AChRs are concentrated only at the crests of the junctional folds, giving the synapse a characteristic pretzel-like appearance (reviewed by Sanes and Lichtman, 2001) (see Box 1). This

maturation appears to require the Rho guanine nucleotide exchange factor (GEF) ephexin1 (Shi et al., 2010). The high AChR concentration results from at least three cellular mechanisms: AChR redistribution, expression and turnover (Fig. 2).

**Motoneuron, muscle fiber and glial cell interactions**

NMJ formation appears to require interactions among motoneurons, skeletal muscle fibers and glial cells. Factors released from motoneurons control postsynaptic differentiation directly by stimulating receptors on muscle cells or indirectly by promoting glial cell differentiation and function. In *Drosophila*, glutamate receptors preferentially cluster opposite to sites of high glutamate release, suggesting a role for glutamate in synaptic receptor clustering (Marrus and DiAntonio, 2004). However, an increase in extracellular glutamate appears to suppress receptor clustering at synapses through constitutive desensitization (Augustin et al., 2007). In rodents, muscle depolarization suppresses AChR subunit gene transcription and increases AChR degradation (Salpeter et al., 1986) (reviewed by Schaeffer et al., 2001). Furthermore, AChR clusters grow faster and larger in mutant mice that lack choline acetyltransferase (ChAT), an enzyme that is crucial for ACh biosynthesis (Brandon et al., 2003; Misgeld et al., 2002), suggesting that ACh might negatively regulate aneural AChR clustering. Thus, muscle activity inhibits the three key mechanisms that contribute to the high density of AChRs at rodent NMJs (Fig. 2). Downstream mechanisms include activation of the serine/threonine kinase cyclin-dependent kinase 5 (Cdk5) or of  $Ca^{2+}$ /calmodulin-dependent protein kinase II (CaMKII; Camk2a – Mouse Genome Informatics) (Fu et al., 2005; Lin et al., 2005; Tang et al., 2001). The negative effect of ACh is global because ACh-mediated activation affects the entire muscle fiber; the high AChR density at the NMJ probably results from motoneuron-derived positive signals counteracting the inhibitory effect (Fig. 2). One such factor, agrin, is discussed in detail in the next section.

The importance of glial cells for NMJ formation is only beginning to be appreciated. A recent study demonstrates that muscle fibers express neurotrophin 3 to modulate the number of Schwann cells, the myelinating glial cells of the peripheral nervous system, in developing NMJs (Hess et al., 2007). Motoneurons release neuregulin 1 to promote Schwann cell survival and development (Hayworth et al., 2006; Trachtenberg and Thompson, 1996) (reviewed by Fischbach and Rosen, 1997; Lemke, 1993). Mice lacking neuregulin 1 or its receptors *ErbB2* or *ErbB3* lack Schwann cells (Lin et al., 2000; Morris et al., 1999; Riethmacher et al., 1997; Woldeyesus et al., 1999; Wolpowitz et al., 2000), and their motoneurons form transient synapses with muscle fibers that fail to be maintained, indicating a crucial role for Schwann cells in NMJ formation and maintenance. Although the mechanisms involved remain unclear, experimental evidence indicates several possibilities. For example, Schwann cells might guide motoneuron growth cones (Reddy et al., 2003), as they sprout and guide nerve terminal regeneration after nerve injury (Reynolds and Woolf, 1992; Son and Thompson, 1995a; Son and Thompson, 1995b). They have also been shown to generate diffusible signals, one of which might be transforming growth factor  $\beta$  (TGF $\beta$ ) (Feng and Ko, 2008), to promote NMJ development or function (Cao and Ko, 2007). This is similar to astrocytes, which regulate CNS synaptogenesis through diffusible factors (Christopherson et al., 2005). In *Drosophila*, glial cells have been shown to release axotactin, a neurexin-related molecule, to control the electrical properties of target axons and

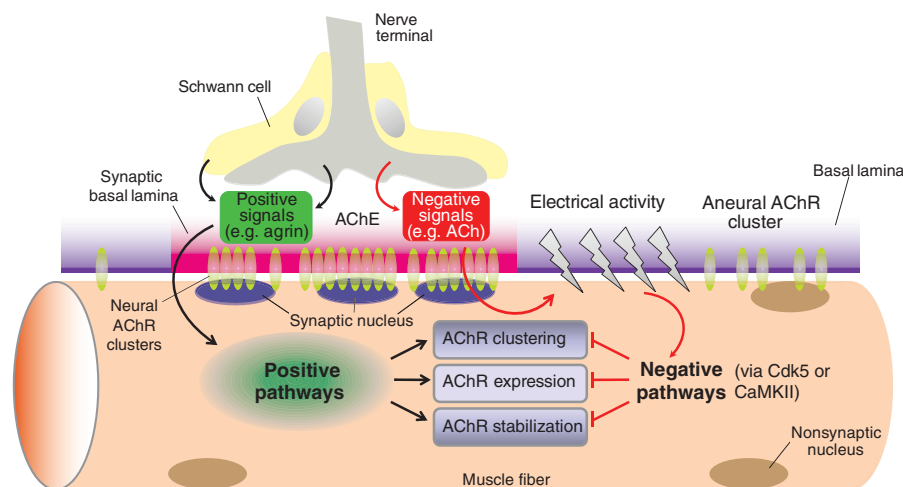

**Fig. 2. Coordinated action of positive and negative signals in NMJ assembly.** At least three cellular mechanisms contribute to the high density of AChRs at the NMJ. First, AChR might redistribute from primitive clusters to the synaptic area, either by lateral movement, by diffusion in the plasma membrane or by endo- and exocytosis. Second, muscle fibers are multi-nucleated cells, and only the nuclei beneath the postsynaptic membrane (synaptic nuclei) are actively transcribing the AChR subunit genes, contributing to synapse-specific AChR expression. Third, AChR turnover rate is reduced at mature NMJ or when clustered (as shown by the half-life of AChRs at the NMJ at 8-14 days compared with 17-24 hours for non-clustered or embryonic AChR). Motor nerves activate muscle fibers by releasing ACh, a negative signal, which activates AChR. Muscle activation stimulates the serine/threonine kinases cyclin-dependent kinase 5 (Cdk5) and  $\text{Ca}^{2+}$ /calmodulin-dependent kinase II (CaMKII) to inhibit AChR clustering, to suppress AChR expression and to destabilize AChR clusters in entire muscle fibers. At the same time, nerves also release positive signals, such as agrin, which counteract the effects of negative signals, resulting in a high AChR concentration at the NMJ.

to maintain NMJ transmission by glutamate uptake (Augustin et al., 2007; Rival et al., 2006; Yuan and Ganetzky, 1999). Finally, recent studies in both rodents and *Drosophila* uncovered another important role for glia in NMJ development: to engulf and clean up axons that become fragmented during synapse elimination (Bishop et al., 2004; Fuentes-Medel et al., 2009).

### The agrin/Lrp4/Musk pathway regulates vertebrate NMJ assembly

Motoneurons counteract the inhibitory effects of ACh on AChR clustering through positive signals, of which the agrin/Lrp4/Musk pathway is the best characterized.

#### Agrin induces AChR clustering

The glycoprotein agrin was originally identified in the electric organ of stingrays for AChR clustering activity (reviewed by McMahan, 1990). It is synthesized in motoneurons, transported along axons and released into synaptic basal lamina, where it induces postsynaptic differentiation, including AChR clustering in cultured muscle cells (Campanelli et al., 1991; Godfrey et al., 1984; Ruegg et al., 1992). Agrin is sufficient to induce ectopic AChR clusters in adult muscles (Jones et al., 1997) and to elicit the formation of a postsynaptic apparatus in denervated muscles (Bezakova et al., 2001; Gesemann et al., 1995; Herbst and Burden, 2000; Jones et al., 1997). Importantly, mice that carry a mutation in the gene encoding agrin (*agrin*<sup>-/-</sup>) lack NMJs, and synaptic proteins, including AChRs, are distributed throughout the mutant muscle fibers (Gautam et al., 1996) (reviewed by Ruegg and Bixby, 1998). These observations demonstrate a pivotal role for agrin in AChR clustering and NMJ formation. Intriguingly, *agrin*<sup>-/-</sup> mice are able to form aneural AChR clusters prior to innervation, which suggests that agrin is not essential for prepatternning (Lin et al., 2001; Yang et al., 2001). Muscle fibers and Schwann cells also produce agrin, but neural agrin is 1000-

fold more effective in stimulating AChR clustering because it contains certain key splice inserts at the C terminus (Gesemann et al., 1995; Reist et al., 1992).

#### Musk as master organizer of NMJ development

Musk was discovered owing to its abundance in the synapse-rich Torpedo electric organ (Jennings et al., 1993) and co-localizes with AChRs at NMJs (Valenzuela et al., 1995). In *Musk*<sup>-/-</sup> mice, muscle fibers form neither aneural clusters nor prepatterns prior to innervation, and no NMJs are formed either (DeChiara et al., 1996; Lin et al., 2001; Yang et al., 2001). Instead, AChRs are evenly distributed along *Musk*<sup>-/-</sup> muscle fibers, suggesting a crucial role of Musk for both prepatternning and nerve-induced AChR clusters. Indeed, neuronal agrin is unable to induce AChR clusters in *Musk*<sup>-/-</sup> muscle cells (Glass et al., 1996), but agrin sensitivity can be restored through expressing wild-type Musk (Herbst and Burden, 2000; Zhou et al., 1999). Thus, muscle fiber prepatternning requires Musk, but not agrin, whereas the formation of nerve-induced AChR clusters and NMJs requires both. Correspondingly, ectopic Musk expression stimulates synapse formation in the absence of agrin and rescues the lethality of mutations in the gene that encodes agrin (Kim and Burden, 2008). Finally, motoneuron terminals become highly branched and innervate a broader region in *Musk*<sup>-/-</sup> mice, suggesting that Musk plays a role in presynaptic differentiation (DeChiara et al., 1996; Lin et al., 2001; Yang et al., 2001).

As a receptor tyrosine kinase, it is not surprising that Musk interacts with a plethora of proteins that regulate its activity or activate downstream pathways (see below; see also Fig. 3). Interestingly, however, Musk also associates with scaffold proteins implicated in NMJ assembly, the regulation of gene expression and nuclear location (see Box 2). Together, these observations suggest that Musk might form a signalosome crucial for NMJ formation (reviewed by Luo et al., 2003a).

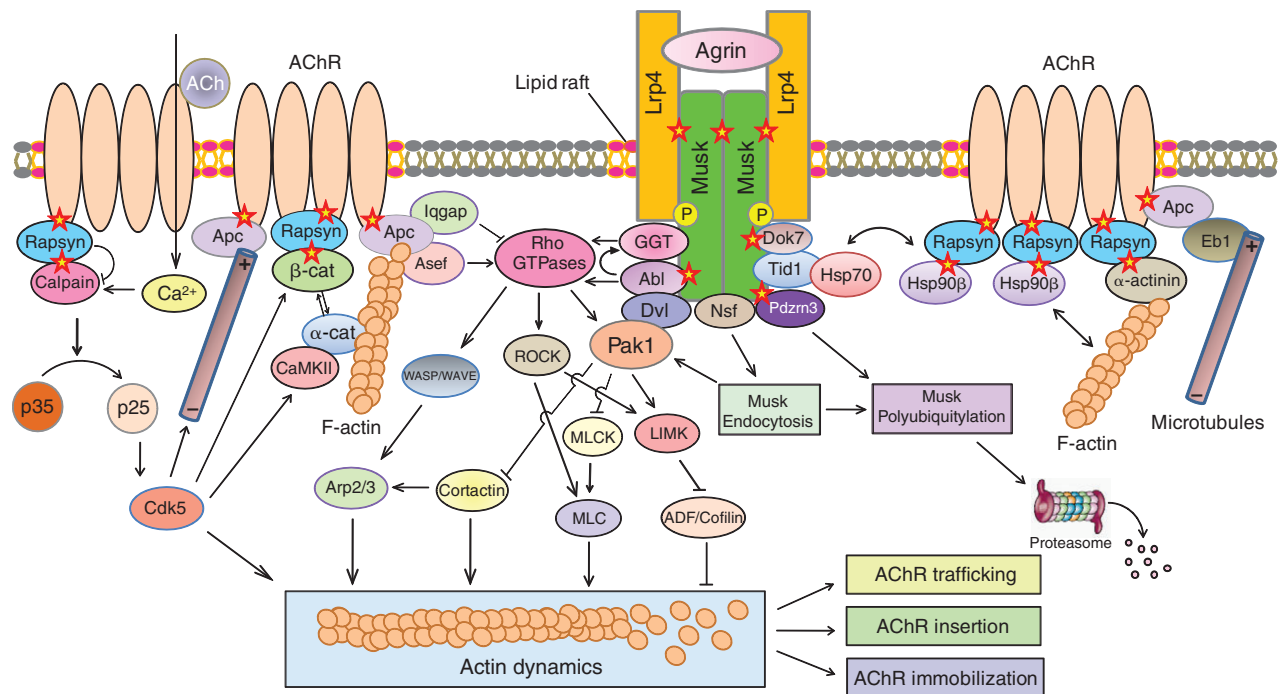

**Fig. 3. Intracellular pathways activated by agrin for AChR clustering.** Agrin interacts with Lrp4 to increase its interaction with Musk and the dimerization of Musk and thus Musk activation. Subsequently, interactions between the kinase and distinct proteins, such as Dok7, which are crucial for its catalytic activity and for downstream signaling, are increased. Concomitantly, the tyrosine kinase Abl and the metalloenzyme geranylgeranyl transferase I (GGT) are activated. GGT facilitates Rho GTPase activation, which, via multiple pathways, regulates the actin dynamics involved in AChR trafficking, membrane insertion and immobilization. Agrin also stimulates the association of AChR with rapsyn and Apc, which link the receptor directly or indirectly to the cytoskeleton. Rapsyn stability is increased at the synapse by the chaperone Hsp90 $\beta$ , and rapsyn interacts with and inhibits calpain, and thus antagonizes the AChR cluster-dispersing effect of ACh. Agrin signaling is regulated by Musk endocytosis, the E3 ubiquitin ligase Pdzrn3, lipid microdomains (Kishi et al., 2005; Stetzkowski-Marden et al., 2006; Willmann et al., 2006; Zhu et al., 2006) and intracellular calcium (Megeath and Fallon 1998). Many pathways illustrated here have been identified in cultured muscle and non-muscle cells, and their role *in vivo* remains to be studied. For example, mice lacking Shp2, a cytoplasmic tyrosine phosphatase, are viable and form normal NMJs (Dong et al., 2006), although many *in vitro* studies suggest a crucial role in AChR clustering. See text for details. Stars indicate protein-protein interactions that are increased by agrin. Red lipid bilayers indicate lipid rafts.

### Lrp4 as an agrin co-receptor

Although agrin and Musk are essential for NMJ formation, the two proteins do not interact directly (Glass et al., 1996). How signals are transmitted from agrin to Musk has, until recently, been a fundamental gap in the understanding of NMJ formation. A hypothetical molecule, myotube-associated specificity component (MASC), was proposed to serve as an agrin receptor (Glass et al., 1996), but despite extensive studies, its identity remained unknown until recently.

Genetic studies of digit development indicated that the single-pass transmembrane protein low-density lipoprotein receptor-related protein 4 (Lrp4) is required for NMJ formation, as well as for the development of limbs, lungs, kidneys and ectodermal organs (Johnson et al., 2005; Simon-Chazottes et al., 2006; Weatherbee et al., 2006). Mice that lack Lrp4 die at birth with NMJ defects that resemble those of *Musk*<sup>-/-</sup> mutant mice (Weatherbee et al., 2006). Recently, two independent studies reported that Lrp4 is an agrin co-receptor (Kim et al., 2008; Zhang et al., 2008). Lrp4 binds selectively to neural agrin (Kim et al., 2008; Zhang et al., 2008); this interaction is of a high affinity and direct (Zhang et al., 2008). Moreover, Lrp4 is necessary for agrin-induced Musk activation and AChR clustering in cultured muscle cells, and is sufficient to reconstitute Musk signaling in non-muscle cells (Kim et al., 2008; Zhang et al., 2008). Furthermore, Lrp4 is expressed specifically in

myotubes and is concentrated at the NMJ (Zhang et al., 2008). These findings indicate that Lrp4 is probably the missing link that couples agrin to Musk activation.

Lrp4 is a member of the low-density lipoprotein receptor (LDLR) family. It contains a large extracellular N-terminal region, a single transmembrane domain and a short C-terminal region without an identifiable catalytic domain (Johnson et al., 2005; Lu Y. et al., 2007; Tian et al., 2006; Yamaguchi et al., 2006). How Lrp4 regulates Musk activity remains unknown. Intriguingly, Lrp4 self-associates (Kim et al., 2008) and can also interact with Musk through the extracellular domains of the two proteins (Kim et al., 2008; Zhang et al., 2008), in agreement with an earlier finding of binding activity on the myotube surface for the Musk extracellular domain as involved in AChR clustering (Wang, Q. et al., 2008). Therefore, Lrp4 could function in basal Musk activation in the absence of agrin, as well as in agrin-induced activation. Observations that Lrp4 co-expression alone is able to increase Musk activity support this notion (Kim et al., 2008; Zhang et al., 2008). In addition, the Lrp4 intracellular domain becomes tyrosine phosphorylated in agrin-stimulated myotubes (Zhang et al., 2008) and contains a typical NPxY motif and five additional tyrosine residues that may interact with phospho-tyrosine binding (PTB) or Src homology 2 (SH2) domains. In the related proteins Ldlr, Lrp1 and Lrp2, the NPxY motif serves as a docking site for adapter proteins (reviewed by Herz and Bock, 2002). The juxtamembrane domain of

### Box 2. A Musk organizing scaffold

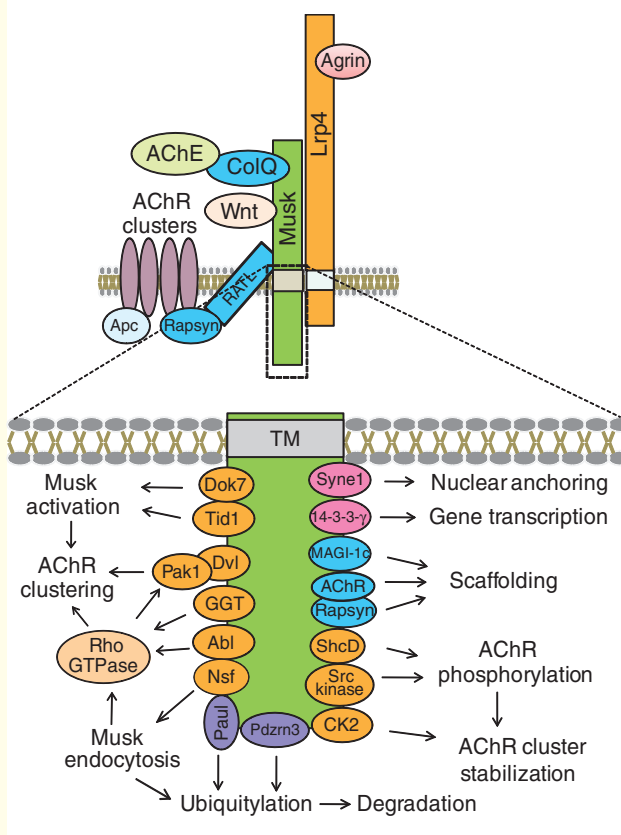

Musk appears to be a master organizer of postsynaptic development at the NMJ. Mice with mutations in the gene that encodes Musk have deficiencies in forming primitive AChR clusters or prepatterned muscle fibers, and they do not form nerve-induced AChR clusters or NMJs. Evidence suggests that Musk does not only act as a receptor and tyrosine kinase for agrin, which initiates pathways leading to postsynaptic differentiation (see Fig. 3). By interacting with additional proteins, of which a growing number is being identified, Musk might also serve as a scaffold organizer that is crucial for compartmentalized signaling. Based on their function, Musk-interacting proteins can be classified into four groups (see figure). The first group (orange) is necessary for Musk activity or downstream signaling. The second group (purple) controls agrin/Musk signaling. The function of the proteins in these two groups is discussed in Fig. 3 and its related text. The third group (blue) consists of scaffold proteins, including rapsyn (Antolik et al., 2006; Apel et al., 1997), ColQ [a protein for acetylcholinesterase (AChE) enrichment in the synaptic cleft (Cartaud et al., 2004)], the MAGUK protein MAGI-1c (Strochlic et al., 2001) and AChR (Fuhrer et al., 1997). The fourth group (pink) includes proteins that might regulate gene expression, including 14-3-3 $\gamma$ , a protein thought to regulate synaptic gene expression at the NMJ (Strochlic et al., 2004), and synaptic nuclear envelope 1 (Syne1), a nuclear envelope protein enriched in synaptic nuclei (Apel et al., 2000). This interaction was thought to help anchor synaptic nuclei in the synaptic region of NMJs, but although muscle nuclei in both synaptic and non-synaptic regions are disorganized in *Syne1*-null mutant mice, their NMJs are apparently normal (Zhang X. et al., 2007). These results indicate that the proper position of synaptic nuclei might not be as crucial as previously thought. It is worth pointing out that, unless otherwise discussed, the suggested functions of many of the Musk-interacting proteins have not been tested in vivo. See text for details.

Musk contains a similar motif (Y553) that becomes tyrosine phosphorylated in response to agrin stimulation and that is necessary for agrin-induced AChR clustering (Adams et al., 1995; Herbst and Burden, 2000; Zhou et al., 1999). Its interaction with the PTB domain of the adapter protein downstream-of-tyrosine-kinase-7 (Dok7) is required for Musk activation and downstream signaling (Okada et al., 2006). Mice that carry a mutation in *Dok7* lack NMJs, and mutant muscle cells do not form AChR clusters in response to agrin, whereas forced expression of *Dok7* activates Musk and induces aneural AChR clusters, indicating that *Dok7* is also able to activate Musk in the absence of agrin (Okada et al., 2006). It would be interesting to investigate whether *Lrp4* interacts with *Dok7*, and whether this interaction is crucial for agrin function.

Taken together, *Lrp4* could mediate or regulate Musk signaling in three different ways: through maintaining basal activity by direct interaction; through serving as an agrin receptor; or through transducing signals via its intracellular domain.

### Agrin/Lrp4/Musk signaling

Recent studies have shed light on the mechanisms controlling the agrin signaling pathway (Fig. 3). As discussed above, Musk activity is regulated by *Dok7* and *Lrp4*. Musk also interacts with tumorous imaginal discs (*Tid1*; also known as *Dnaja3*), which is necessary for *Dok7* binding to Musk in response to agrin (Linnoila et al., 2008). Upon activation, Musk becomes rapidly internalized, which is required for AChR clustering (Zhu et al., 2008). This ligand-dependent endocytosis is regulated by the ATPase N-ethylmaleimide sensitive fusion protein, which interacts directly with Musk (Fig. 3; see also Box 2). Endocytosed Musk might also undergo proteasomal degradation, probably mediated by the E3 ligase Ariadne-like ubiquitin ligase (Paul) and PDZ domain containing RING finger 3 (*Pdzrn3*) (Bromann et al., 2004; Lu, Z. et al., 2007). Thus, agrin-Musk signaling is tightly controlled.

The signals that lead from Musk activation to AChR clustering have been extensively investigated in cultured muscle cells and in *Xenopus* neuron-muscle co-culture, and several pathways have been identified (Fig. 3).

First, AChR redistribution and anchoring are thought to involve cytoskeletal reorganization (Bloch, 1986; Dai et al., 2000), and numerous studies have investigated how Musk activation might trigger this. The underlying mechanism probably involves the tyrosine kinase *Pak1* (Finn et al., 2003) and the metalloenzyme geranylgeranyl transferase I (GGT), which activates GTPases by prenylation (Luo et al., 2003b); both interact with Musk and are activated in agrin-stimulated muscle cells. Subsequently, small GTPases of the Rho family are activated (Weston et al., 2003; Weston et al., 2000). Rho GTPases are known to be activated by guanine-nucleotide exchange factors (GEFs) and inhibited by GTPase-activating proteins (GAPs) in other cells, but which GEF or GAP proteins are regulated by agrin remains unclear. However, a recent study reports that the agrin-mediated activation of Rho GTPases requires PI 3-kinase (Nizhynska et al., 2007).

One target of the activated Rho GTPases is the serine/threonine kinase *Pak1*, which is associated with Musk through *Dvl* (Luo et al., 2002). *Pak1* might regulate actin dynamics by phosphorylating cortactin (Webb et al., 2006), an actin-binding protein present at developing NMJs (Peng et al., 1997). *Pak1* also suppresses myosin light chain kinase (MLCK) and thus reduces the phosphorylation of myosin light chains (MLCs) and the association of MLCs with actin filaments. In addition, *Pak1* activates LIM kinase, which phosphorylates and inhibits actin depolymerizing factor (ADF)/cofilin (Edwards et al., 1999;

Soosairajah et al., 2005); this, in turn, regulates actin-dependent vesicular AChR trafficking to the postsynaptic membrane (Lee et al., 2009). Other targets of Rho GTPases include Wiskott-Aldrich syndrome protein (WASP) family proteins, which activate the actin-related protein 2 and 3 (Arp2/3) complex (reviewed by Millard et al., 2004) (Fig. 3), and Rho-associated protein kinase (ROCK), which increases MLC phosphorylation.

Second, rapsyn interacts with AChRs (Burden et al., 1983; Sealock et al., 1984) and is essential for aneural and neural AChR clusters both in vivo and in vitro (Apel et al., 1995; Gautam et al., 1996; Glass et al., 1996). Rapsyn has recently been shown to interact with  $\alpha$ -actinin and  $\beta$ -catenin (Dobbins et al., 2008; Zhang, B. et al., 2007) (Fig. 3).  $\alpha$ -Actinin is an actin crosslinker whereas, in this context,  $\beta$ -catenin is thought to regulate  $\alpha$ -catenin-dependent actin polymerization. Suppressing the expression of either protein inhibits agrin-induced AChR clustering. Agrin regulates rapsyn function in at least two ways. First, it stimulates the interaction of rapsyn with surface AChRs (Moransard et al., 2003) and with  $\alpha$ -actinin (Dobbins et al., 2008), and could thus lead to AChR clustering. Second, rapsyn is an extremely unstable protein (its half-life is ~6 hours in muscle cells) (Luo et al., 2008). Its interaction with the molecular chaperone heat-shock protein 90 $\beta$  (Hsp90 $\beta$ ), which is enhanced by agrin, could prevent it from being degraded at the synapse (Luo et al., 2008). Intriguingly, Hsp90 $\beta$  has been implicated in cross-linking branched actin filaments (Park et al., 2007), establishing another link between AChR clustering and cytoskeletal dynamics.

Third, agrin induces the association of AChRs with adenomatous polyposis coli (Apc), which is necessary for AChR clustering (Wang et al., 2003) (Fig. 3). Apc is crucial for cell polarity and migration, and can bind directly to either actin filaments or microtubules (Moseley et al., 2007), or indirectly to microtubules via end-binding protein 1 (Eb1). Apc also associates with the GEF Asef and the IQ-motif-containing GTPase activation protein 1 (Iqgap1) (Kawasaki et al., 2000; Watanabe et al., 2004) and might recruit them into the proximity of AChR clusters, contributing to cytoskeletal reorganization.

Fourth, agrin stimulates AChR tyrosine phosphorylation and might thus stabilize AChR clusters (Fig. 3; Box 2). This process appears to involve Src homologous collagen D (ShcD; also known as Shc4) (Jones et al., 2007) and several kinases, including Src family kinases (Borges and Ferns, 2001; Mittaud et al., 2001; Mohamed et al., 2001) and casein kinase 2 (CK2) (Cheusova et al., 2006). Mutant mice that lack these kinases form morphologically normal NMJs, but AChR clusters become unstable (Cheusova et al., 2006; Smith et al., 2001).

Finally, agrin enhances the interaction of rapsyn with calpain, an enzyme that is involved in Cdk5 activation, and thus inhibits calpain activity (Chen et al., 2007) (Fig. 3). Considering the synaptic localization of rapsyn, this result suggests that it acts locally to inhibit Cdk5 activity and thus counteract ACh-mediated AChR cluster dispersal.

Another exciting area of recent progress regarding the signaling pathways that regulate NMJ formation is the role of Wnt ligands, which is discussed next.

### Wnt signaling in NMJ development

Wnts are a family of secreted glycoproteins that regulate diverse cellular processes, including cell proliferation and fate determination, cell polarity and movement, and programmed cell death through several intracellular pathways (see Box 3). A function for Wnt signaling in the regulation of synaptogenesis was first discovered in the developing rodent cerebellum, where Wnt7a is

used by granule cells as a retrograde signal for axon and growth cone remodeling (Hall et al., 2000). Recent studies in various species provide converging evidence for a pivotal role of Wnt signaling in NMJ development.

### Wnts in the invertebrate NMJ

In *Drosophila* NMJs, motoneurons secrete Wnt ligands that are necessary for both pre- and postsynaptic differentiation (Liebl et al., 2008; Mathew et al., 2005; Packard et al., 2002) (Fig. 4A). Loss-of-function mutations in the *Drosophila* Wnt gene *wingless* (*wg*) reduce the number of synaptic boutons and disrupt synaptic organization (Packard et al., 2002). In response to Wg stimulation, the *Drosophila* Wnt receptor Frizzled 2 (Fz2) is endocytosed postsynaptically and transported to the perinuclear area to be cleaved. Its C-terminal fragment is translocated into the nucleus through a mechanism that requires the adaptor protein Grip (Ataman et al., 2006; Mathew et al., 2005). This Frizzled nuclear import (FNI) pathway is thought to regulate the formation or stabilization of synapses via transcriptional regulation (Fig. 4A). A recent study reports that mutations in the genes encoding Wnt5 and Derailed (an atypical receptor tyrosine kinase) also reduce the number of synaptic boutons (Liebl et al., 2008). Cell type-specific rescue experiments suggest that Wnt5 is secreted by motoneurons and activates Derailed, which is located at the surface of muscle cells, to drive postsynaptic differentiation (Fig. 4A).

Wg also activates Fz on the presynaptic membrane to direct presynaptic differentiation. The disruption of Armadillo (the *Drosophila* homolog of  $\beta$ -catenin) and Pangolin (the *Drosophila* homolog of TCF) has no significant effect on synaptic phenotypes (Miech et al., 2008), which suggests a limited role of the canonical Armadillo/Pangolin-dependent pathway in this process. Instead, the actions of Fz are probably mediated by the inhibition of Shaggy (the *Drosophila* homolog of Gsk3 $\beta$ ), a substrate of which is Futsch [the *Drosophila* ortholog of microtubule associated protein 1B (MAP1B)] (Franciscovich et al., 2008; Franco et al., 2004; Gogel et al., 2006; Roos et al., 2000) (Fig. 4A). Together, these studies indicate that Wnts might serve as both anterograde and retrograde signals to promote NMJ formation in *Drosophila*. In addition, Wnt signaling also controls target specificity by preventing synapse formation on nontarget, neighboring muscle cells (Inaki et al., 2007).

In *C. elegans*, Wnt signaling determines where axons form synapses by inhibiting NMJ formation. The DA9 motoneuron is located near the ventral midline, and its axon first projects posteriorly, then turns towards the dorsal region and ultimately projects anteriorly. Interestingly, it does not form 'en passant' synapses until it reaches the dorsal, anteriormost region of the worm (Fig. 4B). This anti-synaptic effect is mediated by LIN-44/Wnt, secreted in a posterior-anterior gradient by four hypodermal cells in the worm tail (Klassen and Shen, 2007), which appears to localize LIN-17/Fz to the asynaptic region of the axon to inhibit presynaptic assembly via Dvl.

### Wnt acts as a Musk ligand in vertebrates

The phenotypes of Lrp4 and Musk mutant mice are more severe than those of agrin mutant animals. In particular, prepatterning and aneural AChR clusters disappear in Lrp4 and Musk mutant mice, but not in agrin mutants, which suggests the existence of a pathway that requires Musk and Lrp4, but not agrin. Vertebrate Musk is known to have a cysteine-rich domain (CRD) that shows homology to a crucial Wnt-binding domain of the Wnt receptor Fz (Valenzuela et al., 1995) (Box 3). It has been hypothesized that Musk binds and presents Wnts to motor axons to initiate NMJ

## Box 3. Wnt signaling

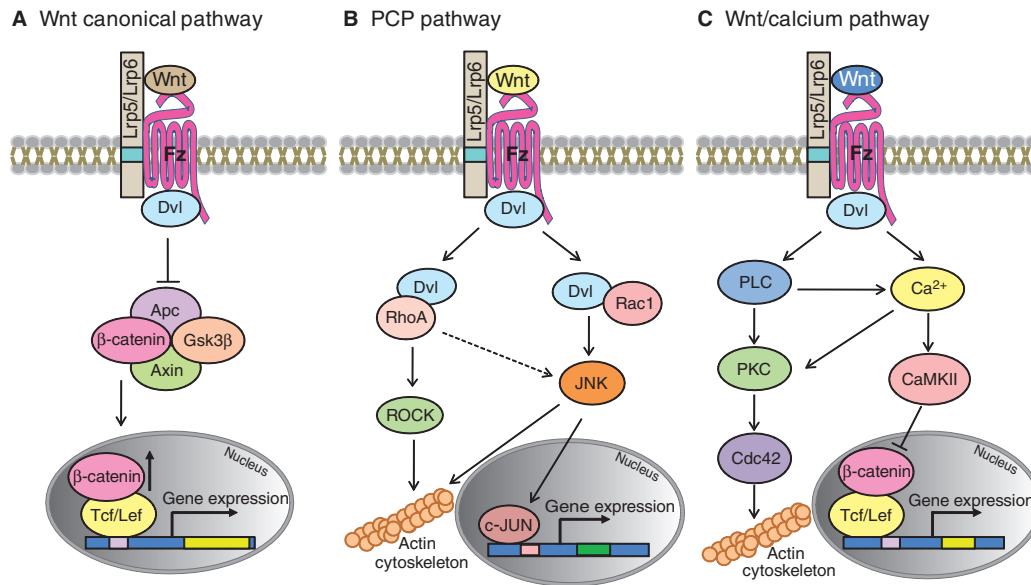

Wnts signal through a receptor complex that consists of the seven-transmembrane frizzled (Fz) receptor and of Lrp5 and Lrp6, two other members of the low-density lipoprotein receptor (LDLR) family (Macdonald et al., 2007). The Wnt signal is subsequently transmitted to the adapter protein dishevelled (Dvl, or Dsh in *Drosophila*), which interacts with Fz, to initiate intracellular canonical and non-canonical pathways. The Wnt signaling pathway diverges into at least three branches downstream of Dvl. In naïve cells, free  $\beta$ -catenin is phosphorylated in the N-terminal region and degraded by a complex including glycogen synthase kinase 3 $\beta$  (Gsk3 $\beta$ ), adenomatous polyposis coli (Apc) and axin. In the so-called canonical pathway (A), Dvl inhibits  $\beta$ -catenin phosphorylation by Gsk3 $\beta$  and thus increases its stability and accumulation in the cytoplasm. Subsequently,  $\beta$ -catenin translocates into the nucleus to regulate gene expression by association with the transcription factor T cell factor/lymphoid enhancer factor 1 (Tcf/Lef1). In non-canonical pathways (B), Dvl activates Rho GTPases, including Rho and Rac1, and c-Jun N-terminal kinase (JNK; also known as Mapk8). In the Wnt/calcium pathway (C), Dvl induces calcium influx, which results in the activation of protein kinase C (PKC) and CaMKII.

formation (reviewed by Burden, 2000). However, no experimental evidence supported a role for Wnts or Wnt signaling components in vertebrate NMJ formation, not until Luo and colleagues showed that Musk interacts with Dvl and that disrupting Dvl function causes both pre- and postsynaptic defects (Luo et al., 2002) (Fig. 5). Subsequently, Apc and  $\beta$ -catenin have been implicated in AChR clustering in vitro and/or in NMJ formation in vivo (Li et al., 2008; Wang et al., 2003). Moreover, as discussed above, Musk associates with the LDLR-family member Lrp4 (Kim et al., 2008; Zhang et al., 2008). Other members of the LDLR family, such as Lrp5 and Lrp6, interact with Fz and are crucial for Wnt function (Fig. 5). Based on these observations, it was speculated that Wnt could bind directly to Musk and could regulate Musk activity (Zhang et al., 2008). Indeed, a recent study indicates that the CRD domain of zebrafish Musk (unplugged) interacts with Wnt11r, and subsequent Dvl-dependent signaling is implicated in the formation of aneural AChR clusters and in guiding motor axons to form NMJs (Jing et al., 2009). Mouse Wnt11, which shows high homology to zebrafish Wnt11r, is expressed in both the spinal cord and in skeletal muscles and can interact with the Musk extracellular domain (B. Zhang and L.M., unpublished). These exciting observations lead us to propose a working model for signaling events in postsynaptic assembly (Fig. 5). According to this model, Wnt binds to and activates Musk prior to innervation, when neural agrin is absent, and the resulting Wnt-Musk signaling regulates axon guidance and aneural cluster formation. After innervation, the Wnt-Musk complex interacts with the agrin/Lrp4/Musk

pathway to regulate agrin-induced AChR clustering (see Fig. 3). In both scenarios, Wnts, via the Frizzled-Lrp5/Lrp6 complex, initiate both canonical and non-canonical pathways to regulate pre- and postsynaptic differentiation.

This model predicts that Wnt might be a Musk ligand in rodents prior to innervation and that it can also regulate innervation-induced AChR clustering (Fig. 5). As there are 19 different Wnt molecules in mice and humans, the regulation of NMJ formation by Wnts in these species is probably complex. The expression of Wnt1, Wnt4, Wnt6 or Wnt7b in mouse muscle cells had no significant effect on basal and agrin-induced AChR clustering (Luo et al., 2002; Zhang, B. et al., 2007). Two recent studies reported opposite effects of Wnt on AChR clustering in cultured mouse muscle C2C12 cells. In one study, Wnt3a was shown to inhibit agrin-induced AChR clustering by suppressing rapsyn expression via  $\beta$ -catenin-dependent signaling (Wang, J. et al., 2008). By contrast, the other study showed that Wnt3 induces AChR microclusters and promotes agrin-induced clustering, with the latter effect apparently mediated by a non-canonical pathway that requires Rac1 (Henriquez et al., 2008). Moreover Wnt signaling could increase Musk expression (Kim et al., 2003). These results indicate that the functions of Wnts and Wnt signaling components in mammalian NMJ formation are probably diverse and deserve systematic investigation.

In summary, emerging evidence supports diverse roles for Wnt ligands and signaling molecules in NMJ development in various species, including *C. elegans*, *Drosophila*, zebrafish and rodents. Some Wnts appear to promote, whereas others inhibit synapse formation, and they also differ in the intracellular responses they



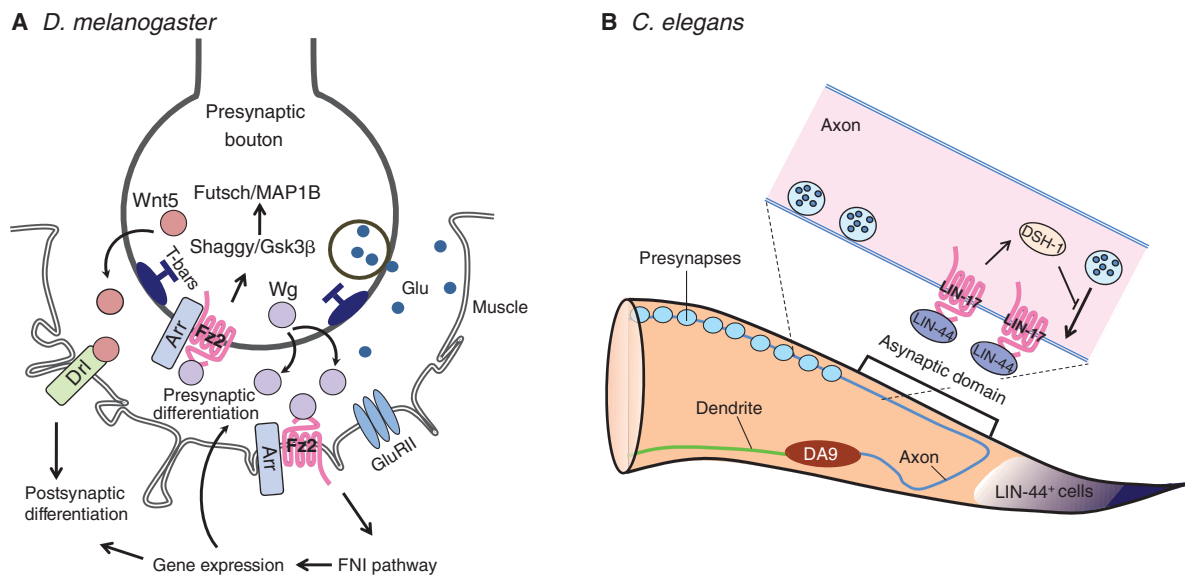

**Fig. 4. NMJ assembly in *Drosophila* and in *C. elegans*.** (A) The *Drosophila* NMJ is a glutamatergic synapse. The Wnt ligands Wingless (Wg) and Wnt5 are released from presynaptic boutons. Binding to the Wnt receptor Frizzled on the postsynaptic membrane, Wg is thought to stimulate a Frizzled nuclear import (FNI) pathway for gene expression. This pathway might be crucial for both pre- and postsynaptic differentiation. Wg also activates Frizzled on the presynaptic membrane to promote presynaptic assembly via a pathway dependent on Gsk3 $\beta$  and MAP1B. Conversely, Wnt5 directly binds to and activates the receptor tyrosine kinase Derailed (Drl) on the postsynaptic membrane for postsynaptic assembly. (B) The *C. elegans* DA9 neuron, which is positioned in the ventral region of the worm, sends a dendrite anteriorly (green) and an axon (blue) that first migrates posteriorly; this soon turns toward the dorsal region and travels anteriorly in the dorsal region. It does not form synapses until it reaches a more anterior region, leaving an asynaptic domain in the axon. LIN-44/Wnt is produced by hypodermal cells and activates LIN-17/Frizzled in the axon to suppress presynaptic assembly.

trigger. Novel non-canonical signaling mechanisms have been identified as being important in NMJ assembly, such as the FNI pathway and the direct interaction between Wnt and Musk. Is Wnt binding sufficient to activate Musk? Does it initiate the same or a distinct cascade from that triggered by agrin binding to Lrp4? If the cascades are the same, how is differential input integrated; if they are distinct, how do they interact with each other? Is there cross-talk between the newly identified Wnt signaling mechanisms and the canonical and non-canonical pathways that are initiated by Wnt interacting with Fz and Lrp5/Lrp6? More work is necessary to answer these questions and to assemble a complete picture from the available and emerging puzzle pieces.

### Retrograde signals for presynaptic development

After discussing how nerve-derived factors regulate post-synaptic development, we now address a question that has been studied for more than a century: how does muscle control presynaptic differentiation? In the 1930s, Viktor Hamburger observed hypoplasia in the spinal cord after the removal of a limb bud, which is now known to be caused by motoneuron apoptosis (Hamburger, 1934). This finding provided the initial evidence for the existence of a target-derived signal and led to the discovery of the nerve growth factor (NGF) family of neurotrophic factors (or neurotrophins) (Levi-Montalcini, 1987). Neurotrophins, however, appear to have only a limited role in motoneuron survival or differentiation (Lu and Je, 2003). For example, muscle-specific ablation of brain-derived neurotrophic factor (Bdnf) has no detectable effect on NMJ morphology or function (X. P. Dong and L.M., unpublished). Here, we consider additional retrograde factors that are implicated in NMJ formation, such as TGF $\beta$ , fibroblast growth factor (FGF), glial cell line-derived neurotrophic factor (Gdnf), and proteins dependent on muscle,  $\beta$ -catenin or  $\beta$ 1 integrin.

### TGF $\beta$

The TGF $\beta$  family is a large family of proteins that includes TGF $\beta$ , bone morphogenetic proteins (BMPs) and activins. These proteins stimulate type I and type II serine/threonine-kinase receptors (TbRI and TbRII) to regulate Smad-dependent transcription and non-Smad downstream components (Derynck and Zhang, 2003) (Box 4). TGF $\beta$  signaling is pivotal in neural development, and genetic studies in *Drosophila* indicate that TGF $\beta$  signaling regulates NMJ development. Mutations in the genes that encode the TGF $\beta$  ligand Glass bottom boat (Gbb), the type I receptors Thickveins (Tkv) and Saxophone (Sax), the type II receptor Wishful thinking (Wit) and Smad transcription factors all result in presynaptic defects: reduced number of NMJs; disrupted T-bars (presynaptic high density areas where synaptic vesicles assemble); and impaired neurotransmitter release (Marques et al., 2002; McCabe et al., 2004; McCabe et al., 2003; Rawson et al., 2003). Moreover, postsynaptic markers, such as Discs large (Dlg) and glutamate receptors (GluRs), appear to be normal in Wit mutants, and NMJ phenotypes could be specifically rescued by the transgenic expression of Wit in motoneurons (Aberle et al., 2002). These observations provide evidence for the idea that Gbb acts as a retrograde signal from muscle tissue that is crucial for presynaptic development (Fig. 6A), although a recent study has suggested a postsynaptic mechanism (Dudu et al., 2006). The function of TGF $\beta$  signaling in *C. elegans* NMJ formation remains unclear, and the role of TIG-2, the *C. elegans* ortholog of *Drosophila* Gbb, has not yet been investigated.

In mice, all three isoforms of TGF $\beta$  are expressed in motoneurons, muscle and Schwann cells (Jiang et al., 2000; McLennan and Koishi, 2002), but there is no evidence for TGF $\beta$  being a retrograde signal in mouse NMJ formation. Instead, TGF $\beta$  causes Schwann cell apoptosis during development (Awatramani et al., 2002; Paterson et al., 2001) and might thus regulate NMJ formation indirectly. *Tgfb1*-

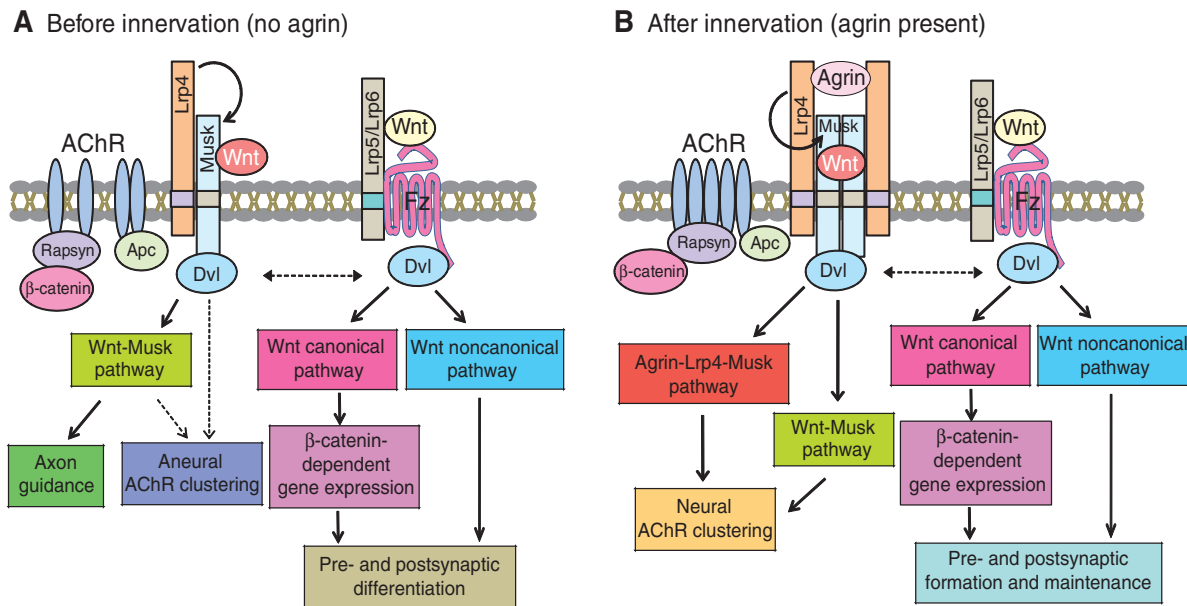

**Fig. 5. A working model of signaling pathways in postsynaptic assembly.** (A) Prior to innervation, Wnt interacts with Musk to activate the Wnt-Musk pathways necessary for forming aneural clusters and for guiding motor growth cones to the middle region of muscle fibers. At the same time, Wnt might also activate Wnt canonical and non-canonical pathways to regulate Musk-dependent pathways. (B) Upon innervation, neural agrin binds to Lrp4 and activates Musk to initiate the agrin-Lrp4-Musk pathway (see Fig. 3) for AChR clustering at the synapse. Wnt might regulate agrin signaling by directly binding to Musk or Lrp5/Lrp6-Frizzled. Dashed lines indicate pathways that remain to be determined.

null mutant mice die prematurely owing to defects in vasculogenesis and angiogenesis or to wasting syndrome (Kulkarni and Karlsson, 1993; Shull et al., 1992), but whether NMJ development is impaired is unknown. *Tgfb2*-null mutant newborn mice are unable to breathe and die in cyanosis soon after birth; however, the morphology and function of their NMJs is grossly normal (Heupel et al., 2008). Their neonatal death is probably due to the aberrant transmission of signals from the respiratory center in the brain. A recent study suggests that TGF $\beta$ 1 might act as a Schwann cell-derived factor to promote NMJ formation in *Xenopus*, probably by increasing agrin expression in motoneurons (Feng and Ko, 2008), highlighting the complexity of the cellular and molecular interactions in this relatively simple structure.

#### FGF, laminin and collagen

Screens for a synaptic vesicle clustering activity in cultured chick motoneurons led to the identification of novel proteins involved in presynaptic differentiation: fibroblast growth factors (FGFs) and signal regulatory proteins (SIRPS) isolated from mouse brains, and collagens from the electric organ of marine rays (Umemori et al., 2004; Umemori and Sanes, 2008) (Fig. 6B). Careful genetic studies of mutant mice suggest that the FGF family members Fgf22, Fgf7 and Fgf10 might be involved in the induction of synaptic vesicle clustering, but not in the maturation or maintenance of nerve terminals (Fox et al., 2007).

The extracellular matrix (ECM) plays an important role in NMJ formation. Once released from motoneurons, agrin is concentrated in the ECM of the synaptic cleft. In *Drosophila*, the N-glycosaminoglycan-binding protein Mind the gap (Mtg) is synthesized in motoneurons and subsequently deposited in the ECM to regulate the extracellular distribution of certain lectin-binding glycans, as well as the localization of postsynaptic integrin receptors (Rushton et al., 2009). The ECM also appears to be key in presynaptic differentiation. Early stages of vesicle clustering are

promoted by collagen  $\alpha$ 2 (IV), a collagen isoform present throughout the basal lamina of adult muscle fibers (Fox et al., 2007). However, the maturation and maintenance of nerve terminals do not require collagen  $\alpha$ 2, but instead depend on laminin  $\beta$ 2 and on the synaptic collagens  $\alpha$ 3 and  $\alpha$ 6 (IV) (Fox et al., 2007; Nishimune et al., 2004; Nishimune et al., 2008; Noakes et al., 1995). How these collagens act remains elusive, but laminin  $\beta$ 2 probably binds directly to and clusters the P/Q-type calcium channels that flank active zones, which in turn recruit other presynaptic components (Nishimune et al., 2004). This hypothesis is supported by studies in mice that lack either laminin  $\beta$ 2 or P/Q-type calcium channels, in which active zones form initially but cannot be maintained (Fig. 6B). Moreover, the disruption of the laminin  $\beta$ 2-calcium channel interaction *in vivo* reduces active zones. These results support a model according to which muscle fibers release multiple factors to orchestrate presynaptic development.

#### Gdnf

Gdnf is one of the most potent factors for motoneuron survival *in vitro* (Oppenheim et al., 1995). It is expressed in muscle cells, whereas its receptor Ret tyrosine kinase is expressed in motoneurons (Baudet et al., 2008) (Fig. 6B). Treating frog neuron-muscle co-cultures with Gdnf increases the frequency as well as the amplitude of spontaneous synaptic currents (Wang et al., 2002), which suggests that it might serve as a retrograde factor. Indeed, the conditional ablation of Ret in mouse cranial motoneurons leads to a severely compromised maturation of presynaptic terminals (Baudet et al., 2008), and the number of endplates is also reduced. In addition, Gdnf overexpression in Myo-Gdnf transgenic mice or Gdnf injection causes multiple innervation and slows the process of synapse elimination (Keller-Peck et al., 2001; Nguyen et al., 1998). Together, these observations suggest that Gdnf might be a muscle-derived factor that regulates presynaptic differentiation.

### Box 4. TGF $\beta$ signaling

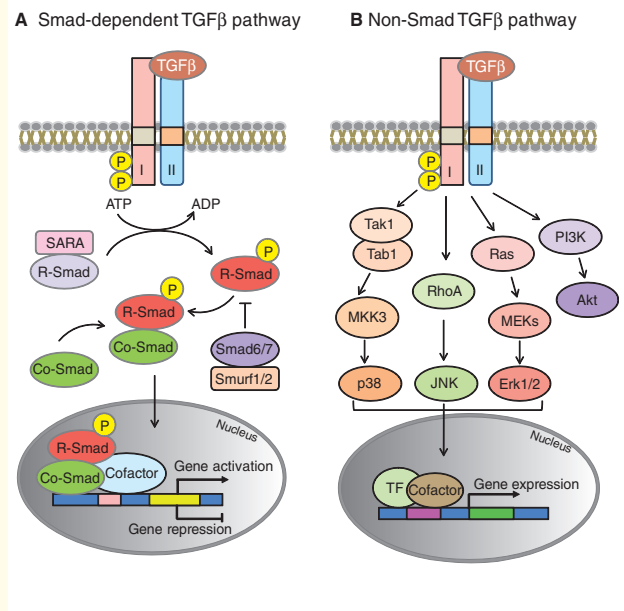

TGF $\beta$  family members include the TGF $\beta$  themselves, bone morphogenetic proteins (BMPs) and the growth and differentiation factors (GDFs) (reviewed by Feng and Derynck, 2005; Gordon and Blobbe, 2008; ten Dijke et al., 2000). TGF $\beta$  ligand binding to a type II receptor leads to its heterodimerization with a type I receptor. Activated type I receptors subsequently phosphorylate downstream targets to initiate two pathways. In the Smad-dependent pathway (A), phosphorylated R-Smads interact with Co-Smads to transduce the signal into the nucleus for gene expression. In non-Smad signaling pathways (B), TGF $\beta$  activated kinase 1 (Tak1), RhoA, Ras and PI3K are activated and induce or repress target gene expression.

### Muscle $\beta$ -catenin- and $\beta$ 1 integrin-dependent retrograde signals

Recent genetic studies have identified novel retrograde pathways that direct presynaptic differentiation in mice. Luo and co-workers found that the inhibition of Dvl function in muscle cells not only attenuates AChR clustering, but also reduces the frequency of spontaneous synaptic currents in neuromuscular synapses in culture, which indicates that a retrograde signal downstream of muscle Dvl is necessary for NMJ formation (Luo et al., 2002). NMJ defects in *Dvl1* mutant mice are mild, probably as a result of the redundant function of two other Dvl isoforms (Henriquez et al., 2008) (Q. Wang and L.M., unpublished). To overcome this redundancy, Li and colleagues studied the role of  $\beta$ -catenin, which is downstream of Dvl (see Box 3), in NMJ formation in vivo (Li et al., 2008).  $\beta$ -catenin expression was specifically suppressed in skeletal muscles to avoid embryonic lethality. Mutant mice died soon after birth with considerable presynaptic defects. The primary branches of phrenic nerves were no longer located in the central region of diaphragm muscle fibers. Secondary branches were extended to innervate larger AChR clusters, which are distributed in a wider area in the central region. Moreover, spontaneous and evoked neurotransmitter release were reduced (Li et al., 2008). By contrast, the NMJ appeared morphologically and functionally normal in motoneuron-specific  $\beta$ -catenin-deficient mice.

These observations provide convincing evidence that muscle, but not neuronal,  $\beta$ -catenin is crucial for NMJ formation, and in particular for presynaptic differentiation or function. The absence of NMJ defects in motoneuron-specific  $\beta$ -catenin-deficient mice indicates that  $\beta$ -catenin-dependent hemophilic adhesion is dispensable. In light of the function of  $\beta$ -catenin in controlling gene transcription, a role for muscle  $\beta$ -catenin in regulating the expression of a signal that is required for NMJ formation seems most likely (Fig. 6B). Intriguingly, whether this signal is downstream of Wnt, and what signaling pathway it triggers, remains to be investigated. Either way, it is anticipated that a powerful array analysis of genes that are differentially expressed in the muscles of muscle-specific  $\beta$ -catenin mutant mice compared with in wild-type mice will identify such a signal.

In addition to binding to P/Q calcium channels, laminin  $\beta$ 2 also activates the ECM receptor  $\beta$ 1 integrin, which increases AChR clustering in the absence of agrin, suggesting that this mechanism is involved in aneural AChR cluster formation and prepatterning. However, in mice that lack  $\beta$ 1 integrin, muscle fibers are prepatterned, and muscle cells form AChR clusters in response to agrin that are indistinguishable from those of wild-type control animals (Schwander et al., 2004), indicating that the laminin  $\beta$ 2/ $\beta$ 1 integrin pathway is dispensable for prepatterning (Fig. 6B). However, in muscle-specific  $\beta$ 1 integrin mutant mice, which die soon after birth, motoneurons branch excessively and fail to terminate at the muscle midline, demonstrating a crucial role for muscle  $\beta$ 1 integrin in presynaptic development, whereas its tissue-specific mutation in motoneurons does not cause obvious neuromuscular phenotypes (Schwander et al., 2004). These observations suggest a retrograde signal downstream of muscle  $\beta$ 1 integrin that is necessary for presynaptic development. Whether this process requires laminin  $\beta$ 2 remains to be investigated. Notably, however, this signal appears to be different from the one that is  $\beta$ -catenin-dependent because the two mutants show distinct presynaptic phenotypes.

### Conclusions

In the past few years, much has been learned about how nerves control NMJ formation. Numerous muscle-derived retrograde signals that direct presynaptic differentiation have been identified. With an increasing number of presynaptic structural and functional proteins identified (reviewed by Jin and Garner, 2008), we anticipate that future work will reveal more about the mechanisms by which retrograde signals direct presynaptic differentiation. We now know more about pathways leading to postsynaptic differentiation. At present, however, very little is known about the signals that pass from Schwann cells to muscle cells or motoneurons in NMJ formation. This area of research seems set for rapid growth because of the increasing understanding of Schwann cell development and the availability of Schwann cell-specific markers and genetic tools.

It is worth noting that many new players in AChR clustering have been characterized in cultured muscle cells, and that their roles in NMJ formation are yet to be verified in vivo. This raises the question of whether 'AChR clustering', a cell-biological phenomenon observed in cultured muscle cells, is relevant to NMJ formation. AChR concentration at the postjunctional folds is thought to be mediated by AChR diffusing on muscle membrane (Edwards and Frisch, 1976). Yet, the area of postjunctional folds accounts for less than 0.1% of the entire muscle fiber surface area (reviewed by Burden et al., 1995). It would therefore seem more economical if synaptic proteins, including AChR, were synthesized locally or delivered in a more efficient manner, such as by endocytosis

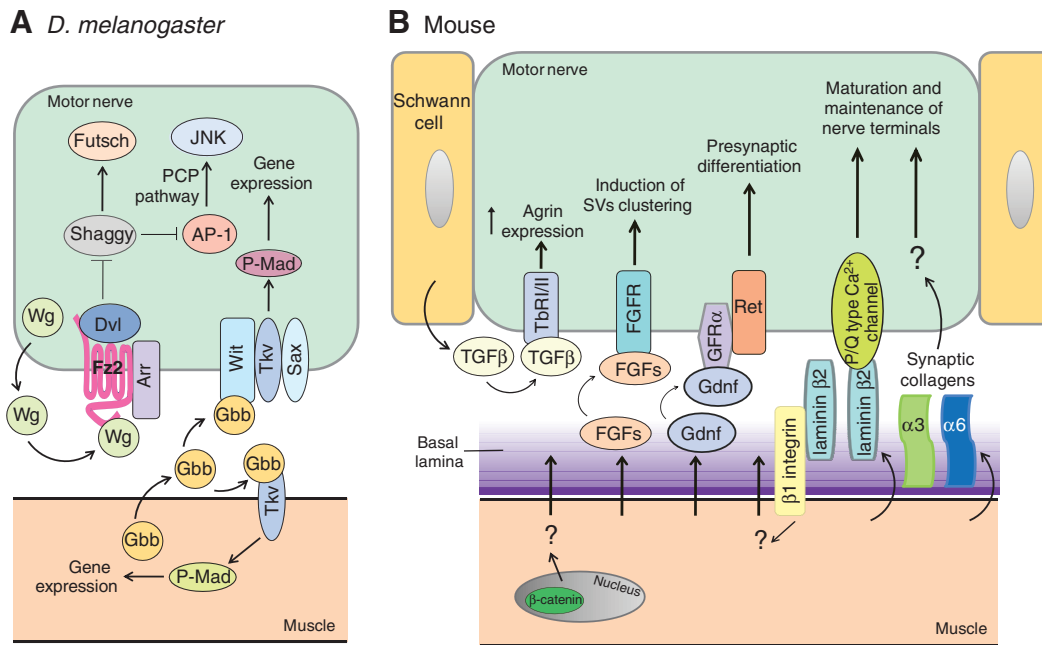

**Fig. 6. Retrograde mechanisms in NMJ formation.** (A) In *Drosophila*, muscle cells release TGF $\beta$ /Gbb for both post- and presynaptic assembly. Wnt released from presynaptic neurons activates the Frizzled-dependent pathway for presynaptic differentiation. (B) In rodents, muscle fibers release Gdnf, which activates the receptor tyrosine kinase Ret for presynaptic differentiation. FGF, synaptic laminin and synaptic collagens orchestrate the complex temporal control of presynaptic differentiation. The interaction of laminin  $\beta$ 2 with P/Q type calcium channels might be required for nerve terminal maturation. Muscle fibers also regulate presynaptic differentiation via a pathway that requires muscle- but not motoneuron-generated  $\beta$ -catenin or  $\beta$ 1 integrin.

(Akaaboune et al., 1999; Bruneau et al., 2005). Indeed, AChR mRNA is enriched at the NMJ, and the transcription of genes encoding synaptic proteins is active in synaptic, but not in extrasynaptic, nuclei (Merlie and Sanes, 1985) (reviewed by Schaeffer et al., 2001). This transcription was thought to be mediated by neuregulin 1 (reviewed by Fischbach and Rosen, 1997), but recent evidence suggests that neuregulin 1 regulates NMJ formation indirectly by promoting Schwann cell differentiation (Escher et al., 2005). The question then becomes: what signals direct synapse-specific transcription? This awaits further investigation. Interestingly, the mRNA-binding proteins Nanos and Pumilio have recently been found to regulate glutamate receptor expression and thus NMJ development in *Drosophila* (Menon et al., 2009). Finally, unlike intracellular scaffolds, less is known about the extracellular counterparts. Yet, some proteins essential for NMJ formation or function, in particular the ACh hydrolase AChE, are enriched in synaptic basal lamina in the synaptic cleft. This localization appears to be mediated by a mechanism distinct from AChR clustering (Cartaud et al., 2004; Peng et al., 1999). Mice lacking perlecan form normal AChR clusters, but lack AChE counterparts (Arikawa-Hirasawa et al., 2002). How AChE localization correlates to pre- and postsynaptic differentiation remains unknown. AChR clustering at the *C. elegans* NMJ requires its interaction with the extracellular region of LEV-10, a transmembrane protein that contains an LDLR domain, and LEV-9, a secreted complement-control-related protein (Gendrel et al., 2009).

Although our review focuses on the molecular mechanisms of diffusible signals, this does not mean that non-diffusible molecules are less important; NMJ assembly might also be regulated by cell-contact-dependent mechanisms. Motoneuron neurite-muscle adhesion increases for a few minutes after

synaptic contact (Evers et al., 1989). Direct interactions between nerve terminals and muscle fibers might be mediated by adhesion molecules, including neural cell adhesion molecule [NCAM (Polo-Parada et al., 2004)], CD24 [a glycosylphosphatidylinositol (GPI)-linked protein (Jevsek et al., 2006)], the immunoglobulin proteins Syg1 and Syg2 (Shen and Bargmann, 2003; Shen et al., 2004), and embigin (Lain et al., 2009). However, the mechanisms by which NMJ development is regulated by cell adhesion remain to be elucidated.

Finally, recent studies have identified several genes the mutation of which leads to NMJ development defects, including the neuron-specific splicing factors Nova1 and Nova2 (Ruggiu et al., 2009), amyloid precursor protein (APP) (Wang et al., 2005), dystrophin-associated proteins (Adams et al., 2004; Banks et al., 2009; Grady et al., 2000; Grady et al., 2003), the glycosyltransferase Large (Herbst et al., 2009), the protein degradation components Fbxo45, Nedd4, Usp14 and Uchl1 (Chen et al., 2009; Chen et al., 2010; Liu et al., 2009; Saiga et al., 2009), the chromatin organization protein HP1 (Aucott et al., 2008) and meltrin  $\beta$ , a metalloprotease (Yumoto et al., 2008). These studies demonstrate that the complexity involved in the formation of this simple, large peripheral synapse is only beginning to be unravelled. For example, the NMJ defects in *Nova1* and *Nova2* mutant mice cannot be rescued by overexpressing neuronal agrin in motoneurons (Ruggiu et al., 2009), suggesting the existence of additional neuronal factors.

Mutations in and/or autoimmune reactions to some proteins essential for NMJ development cause muscular dystrophies, including myasthenia gravis and congenital myasthenic syndrome (reviewed by Engel et al., 2008). Studies of NMJ formation could identify potential culprits and therapeutic targets for these disorders. Finally, many, if not all, of the molecules involved in NMJ formation

are expressed in the brain, including agrin, Lrp4 and  $\beta 1$  integrin, as well as Wnt and its downstream signaling components. Further studies of NMJ assembly are therefore also likely to shed light on the mechanisms of synaptogenesis in the brain.

#### Acknowledgements

We thank Joshua R. Sanes for generously sharing the electron micrograph of rodent NMJ, Kang Shen and Andy Frank for discussion, the anonymous reviewers for valuable suggestions, and Arnab Barik, Chuan Liang and Bin Zhang for discussion. Work performed in our lab is supported by grants from the NIH to L.M. and W.C.X. and from the MDA to L.M. Deposited in PMC for release after 12 months.

#### Competing interests statement

The authors declare no competing financial interests.

#### References

- Aberle, H., Haghghi, A. P., Fetter, R. D., McCabe, B. D., Magalhaes, T. R. and Goodman, C. S. (2002). wishful thinking encodes a BMP type II receptor that regulates synaptic growth in *Drosophila*. *Neuron* **33**, 545-558.
- Adams, L., Carlson, B. M., Henderson, L. and Goldman, D. (1995). Adaptation of nicotinic acetylcholine receptor, myogenin, and MRF4 gene expression to long-term muscle denervation. *J. Cell Biol.* **131**, 1341-1349.
- Adams, M. E., Kramarcy, N., Fukuda, T., Engel, A. G., Sealock, R. and Froehner, S. C. (2004). Structural abnormalities at neuromuscular synapses lacking multiple syntrophin isoforms. *J. Neurosci.* **24**, 10302-10309.
- Akaaboune, M., Culican, S. M., Turney, S. G. and Lichtman, J. W. (1999). Rapid and reversible effects of activity on acetylcholine receptor density at the neuromuscular junction in vivo. *Science* **286**, 503-557.
- Anderson, M. J. and Cohen, M. W. (1977). Nerve-induced and spontaneous redistribution of acetylcholine receptors on cultured muscle cells. *J. Physiol.* **268**, 757-773.
- Antolik, C., Catino, D. H., Resneck, W. G. and Bloch, R. J. (2006). The tetrapeptide repeat domains of rapsyn bind directly to cytoplasmic sequences of the muscle-specific kinase. *Neuroscience* **141**, 87-100.
- Apel, E. D., Roberds, S. L., Campbell, K. P. and Merlie, J. P. (1995). Rapsyn may function as a link between the acetylcholine receptor and the agrin-binding dystrophin-associated glycoprotein complex. *Neuron* **15**, 115-126.
- Apel, E. D., Glass, D. J., Moscoso, L. M., Yancopoulos, G. D. and Sanes, J. R. (1997). Rapsyn is required for MuSK signaling and recruits synaptic components to a MuSK-containing scaffold. *Neuron* **18**, 623-635.
- Apel, E. D., Lewis, R. M., Grady, R. M. and Sanes, J. R. (2000). Syne-1, a dystrophin- and Klarsicht-related protein associated with synaptic nuclei at the neuromuscular junction. *J. Biol. Chem.* **275**, 31986-31995.
- Arikawa-Hirasawa, E., Rossi, S. G., Rotundo, R. L. and Yamada, Y. (2002). Absence of acetylcholinesterase at the neuromuscular junctions of perlecan-null mice. *Nat. Neurosci.* **5**, 119-123.
- Ataman, B., Ashley, J., Gorczyca, D., Gorczyca, M., Mathew, D., Wichmann, C., Sigrist, S. J. and Budnik, V. (2006). Nuclear trafficking of *Drosophila* Frizzled-2 during synapse development requires the PDZ protein dGRIP. *Proc. Natl. Acad. Sci. USA* **103**, 7841-7846.
- Aucott, R., Bullwinkel, J., Yu, Y., Shi, W., Billur, M., Brown, J. P., Menzel, U., Kioussis, D., Wang, G., Reisert, I. et al. (2008). HP1-beta is required for development of the cerebral neocortex and neuromuscular junctions. *J. Cell Biol.* **183**, 597-606.
- Augustin, H., Grosjean, Y., Chen, K., Sheng, Q. and Featherstone, D. E. (2007). Nonvesicular release of glutamate by glial xCT transporters suppresses glutamate receptor clustering in vivo. *J. Neurosci.* **27**, 111-123.
- Awatramani, R., Shumas, S., Kamholz, J. and Scherer, S. S. (2002). TGFbeta1 modulates the phenotype of Schwann cells at the transcriptional level. *Mol. Cell Neurosci.* **19**, 307-319.
- Banks, G. B., Chamberlain, J. S. and Froehner, S. C. (2009). Truncated dystrophins can influence neuromuscular synapse structure. *Mol. Cell Neurosci.* **40**, 433-441.
- Baudet, C., Pozas, E., Adameyko, I., Andersson, E., Ericson, J. and Ernfors, P. (2008). Retrograde signaling onto Ret during motor nerve terminal maturation. *J. Neurosci.* **28**, 963-975.
- Bevan, S. and Steinbach, J. H. (1977). The distribution of alpha-bungarotoxin binding sites of mammalian skeletal muscle developing in vivo. *J. Physiol.* **267**, 195-213.
- Bezakova, G., Helm, J. P., Francolini, M. and Lomo, T. (2001). Effects of purified recombinant neural and muscle agrin on skeletal muscle fibers in vivo. *J. Cell Biol.* **153**, 1441-1452.
- Bishop, D. L., Misgeld, T., Walsh, M. K., Gan, W. B. and Lichtman, J. W. (2004). Axon branch removal at developing synapses by axosome shedding. *Neuron* **44**, 651-661.
- Bloch, R. J. (1986). Actin at receptor-rich domains of isolated acetylcholine receptor clusters. *J. Cell Biol.* **102**, 1447-1458.
- Borges, L. S. and Ferns, M. (2001). Agrin-induced phosphorylation of the acetylcholine receptor regulates cytoskeletal anchoring and clustering. *J. Cell Biol.* **153**, 1-12.
- Braithwaite, A. W. and Harris, A. J. (1979). Neural influence on acetylcholine receptor clusters in embryonic development of skeletal muscles. *Nature* **279**, 549-551.
- Brandon, E. P., Lin, W., D'Amour, K. A., Pizzo, D. P., Dominguez, B., Sugiura, Y., Thode, S., Ko, C. P., Thal, L. J., Gage, F. H. et al. (2003). Aberrant patterning of neuromuscular synapses in choline acetyltransferase-deficient mice. *J. Neurosci.* **23**, 539-549.
- Bromann, P. A., Weiner, J. A., Apel, E. D., Lewis, R. M. and Sanes, J. R. (2004). A putative ariadne-like E3 ubiquitin ligase (PAUL) that interacts with the muscle-specific kinase (MuSK). *Gene Expr. Patterns* **4**, 77-84.
- Bruneau, E., Sutter, D., Hume, R. I. and Akaaboune, M. (2005). Identification of nicotinic acetylcholine receptor recycling and its role in maintaining receptor density at the neuromuscular junction in vivo. *J. Neurosci.* **25**, 9949-9959.
- Burden, S. J. (2000). Wnts as retrograde signals for axon and growth cone differentiation. *Cell* **100**, 495-497.
- Burden, S. J., DePalma, R. L. and Gottesman, G. S. (1983). Crosslinking of proteins in acetylcholine receptor-rich membranes: association between the beta-subunit and the 43 kd subsynaptic protein. *Cell* **35**, 687-692.
- Burden, S. J., Jo, S. A., Tang, J., Zhu, X., Yeadon, J. E. and Simon, A. M. (1995). Polarity in skeletal muscle cells is induced by innervation. *Sem. Dev. Biol.* **6**, 59-65.
- Campanelli, J. T., Hoch, W., Rupp, F., Kreiner, T. and Scheller, R. H. (1991). Agrin mediates cell contact-induced acetylcholine receptor clustering. *Cell* **67**, 909-916.
- Cao, G. and Ko, C. P. (2007). Schwann cell-derived factors modulate synaptic activities at developing neuromuscular synapses. *J. Neurosci.* **27**, 6712-6722.
- Cartaud, A., Strohlic, L., Guerra, M., Blanchard, B., Lambergeon, M., Krejci, E., Cartaud, J. and Legay, C. (2004). MuSK is required for anchoring acetylcholinesterase at the neuromuscular junction. *J. Cell Biol.* **165**, 505-515.
- Chen, F., Qian, L., Yang, Z. H., Huang, Y., Ngo, S. T., Ruan, N. J., Wang, J., Schneider, C., Noakes, P. G., Ding, Y. Q. et al. (2007). Rapsyn interaction with calpain stabilizes AChR clusters at the neuromuscular junction. *Neuron* **55**, 247-260.
- Chen, F., Sugiura, Y., Myers, K. G., Liu, Y. and Lin, W. (2010). Ubiquitin carboxyl-terminal hydrolase L1 is required for maintaining the structure and function of the neuromuscular junction. *Proc. Natl. Acad. Sci. USA* **107**, 1636-1641.
- Chen, P. C., Qin, L. N., Li, X. M., Walters, B. J., Wilson, J. A., Mei, L. and Wilson, S. M. (2009). The proteasome-associated deubiquitinating enzyme Usp14 is essential for the maintenance of synaptic ubiquitin levels and the development of neuromuscular junctions. *J. Neurosci.* **29**, 10909-10919.
- Cheusova, T., Khan, M. A., Schubert, S. W., Gavin, A. C., Buchou, T., Jacob, G., Sticht, H., Allende, J., Boldyreff, B., Brenner, H. R. et al. (2006). Casein kinase 2-dependent serine phosphorylation of MuSK regulates acetylcholine receptor aggregation at the neuromuscular junction. *Genes Dev.* **20**, 1800-1816.
- Christopherson, K. S., Ullian, E. M., Stokes, C. C., Mullowney, C. E., Hell, J. W., Agah, A., Lawler, J., Mosher, D. F., Bornstein, P. and Barres, B. A. (2005). Thrombospondins are astrocyte-secreted proteins that promote CNS synaptogenesis. *Cell* **120**, 421-433.
- Creazzo, T. L. and Sohal, G. S. (1983). Neural control of embryonic acetylcholine receptor and skeletal muscle. *Cell Tissue Res.* **228**, 1-12.
- Dai, Z., Luo, X., Xie, H. and Peng, H. B. (2000). The actin-driven movement and formation of acetylcholine receptor clusters. *J. Cell Biol.* **150**, 1321-1334.
- DeChiara, T. M., Bowen, D. C., Valenzuela, D. M., Simmons, M. V., Poueymirou, W. T., Thomas, S., Kinetz, E., Compton, D. L., Rojas, E., Park, J. S. et al. (1996). The receptor tyrosine kinase MuSK is required for neuromuscular junction formation in vivo. *Cell* **85**, 501-512.
- Derynck, R. and Zhang, Y. E. (2003). Smad-dependent and Smad-independent pathways in TGF-beta family signalling. *Nature* **425**, 577-584.
- Dobbins, G. C., Luo, S., Yang, Z., Xiong, W. C. and Mei, L. (2008). alpha-Actinin interacts with rapsyn in agrin-stimulated AChR clustering. *Mol. Brain* **1**, 18.
- Dong, X. P., Li, X. M., Gao, T. M., Zhang, E. E., Feng, G. S., Xiong, W. C. and Mei, L. (2006). Shp2 is dispensable in the formation and maintenance of the neuromuscular junction. *Neurosignals* **15**, 53-63.
- Dudu, V., Bittig, T., Entchev, E., Kicheva, A., Julicher, F. and Gonzalez-Gaitan, M. (2006). Postsynaptic mad signaling at the *Drosophila* neuromuscular junction. *Curr. Biol.* **16**, 625-635.
- Edwards, C. and Frisch, H. L. (1976). A model for the localization of acetylcholine receptors at the muscle endplate. *J. Neurobiol.* **7**, 377-381.
- Edwards, D. C., Sanders, L. C., Bokoch, G. M. and Gill, G. N. (1999). Activation of LIM-kinase by Pak1 couples Rac/Cdc42 GTPase signalling to actin cytoskeletal dynamics. *Nat. Cell Biol.* **1**, 253-259.
- Engel, A. G., Shen, X. M., Selcen, D. and Sine, S. M. (2008). Further observations in congenital myasthenic syndromes. *Ann. New York Acad. Sci.* **1132**, 104-113.

- Escher, P., Lacazette, E., Courtet, M., Blindenbacher, A., Landmann, L., Bezakova, G., Lloyd, K. C., Mueller, U. and Brenner, H. R. (2005). Synapses form in skeletal muscles lacking neuregulin receptors. *Science* **308**, 1920-1923.
- Evers, J., Laser, M., Sun, Y. A., Xie, Z. P. and Poo, M. M. (1989). Studies of nerve-muscle interactions in Xenopus cell culture: analysis of early synaptic currents. *J. Neurosci.* **9**, 1523-1539.
- Feng, X. H. and Derynck, R. (2005). Specificity and versatility in tgf-beta signaling through Smads. *Annu. Rev. Cell Dev. Biol.* **21**, 659-693.
- Feng, Z. and Ko, C. P. (2008). Schwann cells promote synaptogenesis at the neuromuscular junction via transforming growth factor-beta1. *J. Neurosci.* **28**, 9599-9609.
- Finn, A. J., Feng, G. and Pendergast, A. M. (2003). Postsynaptic requirement for Abl kinases in assembly of the neuromuscular junction. *Nat. Neurosci.* **6**, 717-723.
- Fischbach, G. D. and Rosen, K. M. (1997). ARIA: a neuromuscular junction neuregulin. *Annu. Rev. Neurosci.* **20**, 429-458.
- Flanagan-Steet, H., Fox, M. A., Meyer, D. and Sanes, J. R. (2005). Neuromuscular synapses can form in vivo by incorporation of initially aneural postsynaptic specializations. *Development* **132**, 4471-4481.
- Fox, M. A., Sanes, J. R., Borza, D. B., Eswarakumar, V. P., Fassler, R., Hudson, B. G., John, S. W., Ninomiya, Y., Pedchenko, V., Pfaff, S. L. et al. (2007). Distinct target-derived signals organize formation, maturation, and maintenance of motor nerve terminals. *Cell* **129**, 179-193.
- Franciscovich, A. L., Mortimer, A. D., Freeman, A. A., Gu, J. and Sanyal, S. (2008). Overexpression screen in *Drosophila* identifies neuronal roles of GSK-3 beta/shaggy as a regulator of AP-1-dependent developmental plasticity. *Genetics* **180**, 2057-2071.
- Franco, B., Bogdanik, L., Bobiniec, Y., Debec, A., Bockaert, J., Parmentier, M. L. and Grau, Y. (2004). Shaggy, the homolog of glycogen synthase kinase 3, controls neuromuscular junction growth in *Drosophila*. *J. Neurosci.* **24**, 6573-6577.
- Froehner, S. C. (1993). Regulation of ion channel distribution at synapses. *Ann. Rev. Neuro.* **16**, 347-368.
- Fu, A. K., Ip, F. C., Fu, W. Y., Cheung, J., Wang, J. H., Yung, W. H. and Ip, N. Y. (2005). Aberrant motor axon projection, acetylcholine receptor clustering, and neurotransmission in cyclin-dependent kinase 5 null mice. *Proc. Natl. Acad. Sci. USA* **102**, 15224-15229.
- Fuentes-Medel, Y., Logan, M. A., Ashley, J., Ataman, B., Budnik, V. and Freeman, M. R. (2009). Glia and muscle sculpt neuromuscular arbors by engulfing destabilized synaptic boutons and shed presynaptic debris. *PLoS Biol.* **7**, e1000184.
- Fuhrer, C., Sugiyama, J. E., Taylor, R. G. and Hall, Z. W. (1997). Association of muscle-specific kinase MuSK with the acetylcholine receptor in mammalian muscle. *EMBO J.* **16**, 4951-4960.
- Gautam, M., Noakes, P. G., Mudd, J., Nichol, M., Chu, G. C., Sanes, J. R. and Merlie, J. P. (1995). Failure of postsynaptic specialization to develop at neuromuscular junctions of rapsyn-deficient mice. *Nature* **377**, 232-236.
- Gautam, M., Noakes, P. G., Moscoso, L., Rupp, F., Scheller, R. H., Merlie, J. P. and Sanes, J. R. (1996). Defective neuromuscular synaptogenesis in agrin-deficient mutant mice. *Cell* **85**, 525-535.
- Gendrel, M., Rapti, G., Richmond, J. E. and Bessereau, J. L. (2009). A secreted complement-control-related protein ensures acetylcholine receptor clustering. *Nature* **461**, 992-996.
- Gesemann, M., Denzer, A. J. and Ruegg, M. A. (1995). Acetylcholine receptor-aggregating activity of agrin isoforms and mapping of the active site. *J. Cell Biol.* **128**, 625-636.
- Glass, D. J., Bowen, D. C., Stitt, T. N., Radziejewski, C., Bruno, J., Ryan, T. E., Gies, D. R., Shah, S., Mattsson, K., Burden, S. J. et al. (1996). Agrin acts via a MuSK receptor complex. *Cell* **85**, 513-523.
- Godfrey, E. W., Nitkin, R. M., Wallace, B. G., Rubin, L. L. and McMahan, U. J. (1984). Components of Torpedo electric organ and muscle that cause aggregation of acetylcholine receptors on cultured muscle cells. *J. Cell Biol.* **99**, 615-627.
- Gogel, S., Wakefield, S., Tear, G., Klambt, C. and Gordon-Weeks, P. R. (2006). The *Drosophila* microtubule associated protein Futsch is phosphorylated by Shaggy/Zeste-white 3 at an homologous GSK3beta phosphorylation site in MAP1B. *Mol. Cell Neurosci.* **33**, 188-199.
- Gordon, K. J. and Blobel, G. C. (2008). Role of transforming growth factor-beta superfamily signaling pathways in human disease. *Biochim. Biophys. Acta* **1782**, 197-228.
- Grady, R. M., Zhou, H., Cunningham, J. M., Henry, M. D., Campbell, K. P. and Sanes, J. R. (2000). Maturation and maintenance of the neuromuscular synapse: genetic evidence for roles of the dystrophin-glycoprotein complex. *Neuron* **25**, 279-293.
- Grady, R. M., Akaaboune, M., Cohen, A. L., Maimone, M. M., Lichtman, J. W. and Sanes, J. R. (2003). Tyrosine-phosphorylated and nonphosphorylated isoforms of alpha-dystrobrevin: roles in skeletal muscle and its neuromuscular and myotendinous junctions. *J. Cell Biol.* **160**, 741-752.
- Hall, A. C., Lucas, F. R. and Salinas, P. C. (2000). Axonal remodeling and synaptic differentiation in the cerebellum is regulated by WNT-7a signaling. *Cell* **100**, 525-535.
- Hall, Z. W. and Sanes, J. R. (1993). Synaptic structure and development: the neuromuscular junction. *Cell* **72**, 99-121.
- Hamburger, V. (1934). The effects of wing bud extirpation on the development of the central nervous system in chick embryos. *J. Exp. Zool.* **68**, 449-494.
- Hayworth, C. R., Moody, S. E., Chodosh, L. A., Krieg, P., Rimer, M. and Thompson, W. J. (2006). Induction of neuregulin signaling in mouse schwann cells in vivo mimics responses to denervation. *J. Neurosci.* **26**, 6873-6884.
- Henriquez, J. P., Webb, A., Bence, M., Bildsoe, H., Sahores, M., Hughes, S. M. and Salinas, P. C. (2008). Wnt signaling promotes AChR aggregation at the neuromuscular synapse in collaboration with agrin. *Proc. Natl. Acad. Sci. USA* **105**, 18812-18817.
- Herbst, R. and Burden, S. J. (2000). The juxtamembrane region of MuSK has a critical role in agrin-mediated signaling. *EMBO J.* **19**, 67-77.
- Herbst, R., Iskratsch, T., Unger, E. and Bittner, R. E. (2009). Aberrant development of neuromuscular junctions in glycosylation-defective Large(myd) mice. *Neuromuscul. Disord.* **19**, 366-378.
- Herz, J. and Bock, H. H. (2002). Lipoprotein receptors in the nervous system. *Annu. Rev. Biochem.* **71**, 405-434.
- Hess, D. M., Scott, M. O., Potluri, S., Pitts, E. V., Cisterni, C. and Balice-Gordon, R. J. (2007). Localization of TrkC to Schwann cells and effects of neurotrophin-3 signaling at neuromuscular synapses. *J. Comp. Neurol.* **501**, 465-482.
- Heupel, K., Sargsyan, V., Plomp, J. J., Rickmann, M., Varoqueaux, F., Zhang, W. and Krieglstein, K. (2008). Loss of transforming growth factor-beta 2 leads to impairment of central synapse function. *Neural Dev.* **3**, 25.
- Hoang, B. and Chiba, A. (2001). Single-cell analysis of *Drosophila* larval neuromuscular synapses. *Dev. Biol.* **229**, 55-70.
- Inaki, M., Yoshikawa, S., Thomas, J. B., Aburatani, H. and Nose, A. (2007). Wnt4 is a local repulsive cue that determines synaptic target specificity. *Curr. Biol.* **17**, 1574-1579.
- Jennings, C. G. B., Dyer, S. M. and Burden, S. J. (1993). Muscle-specific trk-related receptor with a kringle domain defines a distinct class of receptor tyrosine kinases. *Proc. Natl. Acad. Sci. USA* **90**, 2895-2899.
- Jevsek, M., Jaworski, A., Polo-Parada, L., Kim, N., Fan, J., Landmesser, L. T. and Burden, S. J. (2006). CD24 is expressed by myofiber synaptic nuclei and regulates synaptic transmission. *Proc. Natl. Acad. Sci. USA* **103**, 6374-6379.
- Jiang, Y., McLennan, I. S., Koishi, K. and Hendry, I. A. (2000). Transforming growth factor-beta 2 is anterogradely and retrogradely transported in motoneurons and up-regulated after nerve injury. *Neuroscience* **97**, 735-742.
- Jin, Y. and Garner, C. C. (2008). Molecular mechanisms of presynaptic differentiation. *Annu. Rev. Cell Dev. Biol.* **24**, 237-262.
- Jing, L., Lefebvre, J. L., Gordon, L. R. and Granato, M. (2009). Wnt signals organize synaptic prepatterning and axon guidance through the zebrafish unplugged/MuSK receptor. *Neuron* **61**, 721-733.
- Johnson, E. B., Hammer, R. E. and Herz, J. (2005). Abnormal development of the apical ectodermal ridge and polysyndactyly in Megf7-deficient mice. *Hum. Mol. Genet.* **14**, 3523-3538.
- Jones, G., Meier, T., Lichtsteiner, M., Witzemann, V., Sakmann, B. and Brenner, H. R. (1997). Induction by agrin of ectopic and functional postsynaptic-like membrane in innervated muscle. *Proc. Natl. Acad. Sci. USA* **94**, 2654-2659.
- Jones, N., Hardy, W. R., Friese, M. B., Jorgensen, C., Smith, M. J., Woody, N. M., Burden, S. J. and Pawson, T. (2007). Analysis of a Shc family adaptor protein, ShcD/Shc4, that associates with muscle-specific kinase. *Mol. Cell Biol.* **27**, 4759-4773.
- Jorgensen, E. and Nonet, M. L. (1995). Neuromuscular junctions in the nematode *C. elegans*. *Semin. Dev. Biol.* **6**, 207-220.
- Kawasaki, Y., Senda, T., Ishidate, T., Koyama, R., Morishita, T., Iwayama, Y., Higuchi, O. and Akiyama, T. (2000). Asef, a link between the tumor suppressor APC and G-protein signaling. *Science* **289**, 1194-1197.
- Keller-Peck, C. R., Feng, G., Sanes, J. R., Yan, Q., Lichtman, J. W. and Snider, W. D. (2001). Glial cell line-derived neurotrophic factor administration in postnatal life results in motor unit enlargement and continuous synaptic remodeling at the neuromuscular junction. *J. Neurosci.* **21**, 6136-6146.
- Keshishian, H., Broadie, K., Chiba, A. and Bate, M. (1996). The *Drosophila* neuromuscular junction: a model system for studying synaptic development and function. *Annu. Rev. Neurosci.* **19**, 545-575.
- Kim, C. H., Xiong, W. C. and Mei, L. (2003). Regulation of MuSK expression by a novel signaling pathway. *J. Biol. Chem.* **278**, 38522-38527.
- Kim, N. and Burden, S. J. (2008). MuSK controls where motor axons grow and form synapses. *Nat. Neurosci.* **11**, 19-27.
- Kim, N., Stiegler, A. L., Cameron, T. O., Hallock, P. T., Gomez, A. M., Huang, J. H., Hubbard, S. R., Dustin, M. L. and Burden, S. J. (2008). Lrp4 is a receptor for Agrin and forms a complex with MuSK. *Cell* **135**, 334-342.
- Kishi, M., Kummer, T. T., Eglén, S. J. and Sanes, J. R. (2005). Ll5beta: a regulator of postsynaptic differentiation identified in a screen for synaptically enriched transcripts at the neuromuscular junction. *J. Cell Biol.* **169**, 355-366.

- Klassen, M. P. and Shen, K.** (2007). Wnt signaling positions neuromuscular connectivity by inhibiting synapse formation in *C. elegans*. *Cell* **130**, 704-716.
- Kulkarni, A. B. and Karlsson, S.** (1993). Transforming growth factor-beta 1 knockout mice. A mutation in one cytokine gene causes a dramatic inflammatory disease. *Am. J. Pathol.* **143**, 3-9.
- Kummer, T. T., Misgeld, T. and Sanes, J. R.** (2006). Assembly of the postsynaptic membrane at the neuromuscular junction: paradigm lost. *Curr. Opin. Neurobiol.* **16**, 74-82.
- Lain, E., Carnejac, S., Escher, P., Wilson, M. C., Lomo, T., Gajendran, N. and Brenner, H. R.** (2009). A novel role for emgigin to promote sprouting of motor nerve terminals at the neuromuscular junction. *J. Biol. Chem.* **284**, 8930-8939.
- LaRochelle, W. J. and Froehner, S. C.** (1986). Determination of the tissue distributions and relative concentrations of the postsynaptic 43-kDa protein and the acetylcholine receptor in Torpedo. *J. Biol. Chem.* **261**, 5270-5274.
- Lee, C. W., Han, J., Bamburg, J. R., Han, L., Lynn, R. and Zheng, J. Q.** (2009). Regulation of acetylcholine receptor clustering by ADF/cofilin-directed vesicular trafficking. *Nat. Neurosci.* **12**, 848-856.
- Lemke, G.** (1993). Transcriptional regulation of the development of neurons and glia. [Review]. *Curr. Opin. Neurobiol.* **3**, 703-708.
- Levi-Montalcini, R.** (1987). The nerve growth factor 35 years later. *Science* **237**, 1154-1162.
- Li, X. M., Dong, X. P., Luo, S. W., Zhang, B., Lee, D. H., Ting, A. K., Neiswender, H., Kim, C. H., Carpenter-Hyland, E., Gao, T. M. et al.** (2008). Retrograde regulation of motoneuron differentiation by muscle beta-catenin. *Nat. Neurosci.* **11**, 262-268.
- Lichtman, J. W. and Colman, H.** (2000). Synapse elimination and indelible memory. *Neuron* **25**, 269-278.
- Liebl, F. L., Wu, Y., Featherstone, D. E., Noordermeer, J. N., Fradkin, L. and Hing, H.** (2008). Derailed regulates development of the *Drosophila* neuromuscular junction. *Dev. Neurobiol.* **68**, 152-165.
- Lin, S., Landmann, L., Ruegg, M. A. and Brenner, H. R.** (2008). The role of nerve- versus muscle-derived factors in mammalian neuromuscular junction formation. *J. Neurosci.* **28**, 3333-3340.
- Lin, W., Sanchez, H. B., Deerinck, T., Morris, J. K., Ellisman, M. and Lee, K. F.** (2000). Aberrant development of motor axons and neuromuscular synapses in erbB2-deficient mice. *Proc. Natl. Acad. Sci. USA* **97**, 1299-1304.
- Lin, W., Burgess, R. W., Dominguez, B., Pfaff, S. L., Sanes, J. R. and Lee, K. F.** (2001). Distinct roles of nerve and muscle in postsynaptic differentiation of the neuromuscular synapse. *Nature* **410**, 1057-1064.
- Lin, W., Dominguez, B., Yang, J., Aryal, P., Brandon, E. P., Gage, F. H. and Lee, K. F.** (2005). Neurotransmitter acetylcholine negatively regulates neuromuscular synapse formation by a Cdk5-dependent mechanism. *Neuron* **46**, 569-579.
- Linnoila, J., Wang, Y., Yao, Y. and Wang, Z. Z.** (2008). A mammalian homolog of *Drosophila* tumorous imaginal discs, Tid1, mediates agrin signaling at the neuromuscular junction. *Neuron* **60**, 625-641.
- Liu, Y., Padgett, D., Takahashi, M., Li, H., Sayeed, A., Teichert, R. W., Olivera, B. M., McArdle, J. J., Green, W. N. and Lin, W.** (2008). Essential roles of the acetylcholine receptor gamma-subunit in neuromuscular synaptic patterning. *Development* **135**, 1957-1967.
- Liu, Y., Oppenheim, R. W., Sugiura, Y. and Lin, W.** (2009). Abnormal development of the neuromuscular junction in Nedd4-deficient mice. *Dev. Biol.* **330**, 153-166.
- Lu, B. and Je, H. S.** (2003). Neurotrophic regulation of the development and function of the neuromuscular synapses. *J. Neurocytol.* **32**, 931-941.
- Lu, Y., Tian, Q. B., Endo, S. and Suzuki, T.** (2007a). A role for LRP4 in neuronal cell viability is related to apoE-binding. *Brain Res.* **1177**, 19-28.
- Lu, Z., Je, H. S., Young, P., Gross, J., Lu, B. and Feng, G.** (2007b). Regulation of synaptic growth and maturation by a synapse-associated E3 ubiquitin ligase at the neuromuscular junction. *J. Cell Biol.* **177**, 1077-1089.
- Luo, S., Zhang, B., Dong, X. P., Tao, Y., Ting, A., Zhou, Z., Meixiong, J., Luo, J., Chiu, F. C., Xiong, W. C. et al.** (2008). HSP90 beta regulates rapsyn turnover and subsequent AChR cluster formation and maintenance. *Neuron* **60**, 97-110.
- Luo, Z., Wang, Q., Zhou, J., Wang, J., Liu, M., He, X., Wynshaw-Boris, A., Xiong, W., Lu, B. and Mei, L.** (2002). Regulation of AChR Clustering by Dishevelled Interacting with MuSK and PAK1. *Neuron* **35**, 489-505.
- Luo, Z., Wang, Q., Dobbins, G. C., Levy, S., Xiong, W. C. and Mei, L.** (2003a). Signaling complexes for postsynaptic differentiation. *J. Neurocytol.* **32**, 697-708.
- Luo, Z. G., Je, H. S., Wang, Q., Yang, F., Dobbins, G. C., Yang, Z. H., Xiong, W. C., Lu, B. and Mei, L.** (2003b). Implication of geranylgeranyltransferase I in synapse formation. *Neuron* **40**, 703-717.
- Macdonald, B. T., Semenov, M. V. and He, X.** (2007). SnapShot: Wnt/beta-catenin signaling. *Cell* **131**, 1204.
- Marques, G., Bao, H., Haerry, T. E., Shimell, M. J., Duchek, P., Zhang, B. and O'Connor, M. B.** (2002). The *Drosophila* BMP type II receptor Wishful Thinking regulates neuromuscular synapse morphology and function. *Neuron* **33**, 529-543.
- Marrus, S. B. and DiAntonio, A.** (2004). Preferential localization of glutamate receptors opposite sites of high presynaptic release. *Curr. Biol.* **14**, 924-931.
- Mathew, D., Ataman, B., Chen, J., Zhang, Y., Cumberledge, S. and Budnik, V.** (2005). Wingless signaling at synapses is through cleavage and nuclear import of receptor DFRizzled2. *Science* **310**, 1344-1347.
- McCabe, B. D., Marques, G., Haghighi, A. P., Fetter, R. D., Crotty, M. L., Haerry, T. E., Goodman, C. S. and O'Connor, M. B.** (2003). The BMP homolog Gbb provides a retrograde signal that regulates synaptic growth at the *Drosophila* neuromuscular junction. *Neuron* **39**, 241-254.
- McCabe, B. D., Hom, S., Aberle, H., Fetter, R. D., Marques, G., Haerry, T. E., Wan, H., O'Connor, M. B., Goodman, C. S. and Haghighi, A. P.** (2004). Highwire regulates presynaptic BMP signaling essential for synaptic growth. *Neuron* **41**, 891-905.
- McLennan, I. S. and Koishi, K.** (2002). The transforming growth factor-betas: multifaceted regulators of the development and maintenance of skeletal muscles, motoneurons and Schwann cells. *Int. J. Dev. Biol.* **46**, 559-567.
- McMahan, U. J.** (1990). The agrin hypothesis. *Cold Spring Harb. Symp. Quant. Biol.* **55**, 407-418.
- Megeath, L. J. and Fallon, J. R.** (1998). Intracellular calcium regulates agrin-induced acetylcholine receptor clustering. *J. Neurosci.* **18**, 672-678.
- Menon, K. P., Andrews, S., Murthy, M., Gavis, E. R. and Zinn, K.** (2009). The translational repressors Nanos and Pumilio have divergent effects on presynaptic terminal growth and postsynaptic glutamate receptor subunit composition. *J. Neurosci.* **29**, 5558-5572.
- Merlie, J. P. and Sanes, J. R.** (1985). Concentration of acetylcholine receptor mRNA in synaptic regions of adult muscle fibres. *Nature* **317**, 66-68.
- Miech, C., Pauer, H. U., He, X. and Schwarz, T. L.** (2008). Presynaptic local signaling by a canonical wingless pathway regulates development of the *Drosophila* neuromuscular junction. *J. Neurosci.* **28**, 10875-10884.
- Millard, T. H., Sharp, S. J. and Machesky, L. M.** (2004). Signalling to actin assembly via the WASP (Wiskott-Aldrich syndrome protein)-family proteins and the Arp2/3 complex. *Biochem. J.* **380**, 1-17.
- Misgeld, T., Burgess, R. W., Lewis, R. M., Cunningham, J. M., Lichtman, J. W. and Sanes, J. R.** (2002). Roles of neurotransmitter in synapse formation: development of neuromuscular junctions lacking choline acetyltransferase. *Neuron* **36**, 635-648.
- Mittaud, P., Marangi, P. A., Erb-Vogtli, S. and Fuhrer, C.** (2001). Agrin-induced activation of acetylcholine receptor-bound Src family kinases requires Rapsyn and correlates with acetylcholine receptor clustering. *J. Biol. Chem.* **276**, 14505-14513.
- Mohamed, A. S., Rivas-Plata, K. A., Kraas, J. R., Saleh, S. M. and Swope, S. L.** (2001). Src-class kinases act within the agrin/MuSK pathway to regulate acetylcholine receptor phosphorylation, cytoskeletal anchoring, and clustering. *J. Neurosci.* **21**, 3806-3818.
- Moransard, M., Borges, L. S., Willmann, R., Marangi, P. A., Brenner, H. R., Ferns, M. J. and Fuhrer, C.** (2003). Agrin regulates rapsyn interaction with surface acetylcholine receptors, and this underlies cytoskeletal anchoring and clustering. *J. Biol. Chem.* **278**, 7350-7359.
- Morris, J. K., Lin, W., Hauser, C., Marchuk, Y., Getman, D. and Lee, K. F.** (1999). Rescue of the cardiac defect in ErbB2 mutant mice reveals essential roles of ErbB2 in peripheral nervous system development. *Neuron* **23**, 273-283.
- Moseley, J. B., Bartolini, F., Okada, K., Wen, Y., Gundersen, G. G. and Goode, B. L.** (2007). Regulated binding of adenomatous polyposis coli protein to actin. *J. Biol. Chem.* **282**, 12661-12668.
- Nguyen, Q. T., Parsadanian, A. S., Snider, W. D. and Lichtman, J. W.** (1998). Hyperinnervation of neuromuscular junctions caused by GDNF overexpression in muscle. *Science* **279**, 1725-1729.
- Nishimune, H., Sanes, J. R. and Carlson, S. S.** (2004). A synaptic laminin-calcium channel interaction organizes active zones in motor nerve terminals. *Nature* **432**, 580-587.
- Nishimune, H., Valdez, G., Jarad, G., Moulson, C. L., Muller, U., Miner, J. H. and Sanes, J. R.** (2008). Laminins promote postsynaptic maturation by an autocrine mechanism at the neuromuscular junction. *J. Cell Biol.* **182**, 1201-1215.
- Nizhynska, V., Neumueller, R. and Herbst, R.** (2007). Phosphoinositide 3-kinase acts through RAC and Cdc42 during agrin-induced acetylcholine receptor clustering. *Dev. Neurobiol.* **67**, 1047-1058.
- Noakes, P. G., Gautam, M., Mudd, J., Sanes, J. R. and Merlie, J. P.** (1995). Aberrant differentiation of neuromuscular junctions in mice lacking s-laminin/laminin beta 2. *Nature* **374**, 258-262.
- Okada, K., Inoue, A., Okada, M., Murata, Y., Kakuta, S., Jigami, T., Kubo, S., Shiraiishi, H., Eguchi, K., Motomura, M. et al.** (2006). The muscle protein Dok-7 is essential for neuromuscular synaptogenesis. *Science* **312**, 1802-1805.
- Oppenheim, R. W., Houenou, L. J., Johnson, J. E., Lin, L. F., Li, L., Lo, A. C., Newsome, A. L., Prevet, D. M. and Wang, S.** (1995). Developing motor neurons rescued from programmed and axotomy-induced cell death by GDNF. *Nature* **373**, 344-346.
- Packard, M., Koo, E. S., Gorczyca, M., Sharpe, J., Cumberledge, S. and Budnik, V.** (2002). The *Drosophila* Wnt, wingless, provides an essential signal for pre- and postsynaptic differentiation. *Cell* **111**, 319-330.

- Panzer, J. A., Gibbs, S. M., Dosch, R., Wagner, D., Mullins, M. C., Granato, M. and Balice-Gordon, R. J. (2005). Neuromuscular synaptogenesis in wild-type and mutant zebrafish. *Dev. Biol.* **285**, 340-357.
- Park, S. J., Suetsugu, S., Sagara, H. and Takenawa, T. (2007). HSP90 cross-links branched actin filaments induced by N-WASP and the Arp2/3 complex. *Genes Cells* **12**, 611-622.
- Paterson, I. C., Matthews, J. B., Huntley, S., Robinson, C. M., Fahey, M., Parkinson, E. K. and Prime, S. S. (2001). Decreased expression of TGF-beta cell surface receptors during progression of human oral squamous cell carcinoma. *J. Pathol.* **193**, 458-467.
- Peng, H. B., Xie, H. and Dai, Z. (1997). Association of cortactin with developing neuromuscular specializations. *J. Neurocytol.* **26**, 637-650.
- Peng, H. B., Xie, H., Rossi, S. G. and Rotundo, R. L. (1999). Acetylcholinesterase clustering at the neuromuscular junction involves perlecan and dystroglycan. *J. Cell Biol.* **145**, 911-921.
- Polo-Parada, L., Bose, C. M., Plattner, F. and Landmesser, L. T. (2004). Distinct roles of different neural cell adhesion molecule (NCAM) isoforms in synaptic maturation revealed by analysis of NCAM 180 kDa isoform-deficient mice. *J. Neurosci.* **24**, 1852-1864.
- Rawson, J. M., Lee, M., Kennedy, E. L. and Selleck, S. B. (2003). Drosophila neuromuscular synapse assembly and function require the TGF-beta type I receptor saxophone and the transcription factor Mad. *J. Neurobiol.* **55**, 134-150.
- Reddy, L. V., Koirala, S., Sugiura, Y., Herrera, A. A. and Ko, C. P. (2003). Glial cells maintain synaptic structure and function and promote development of the neuromuscular junction in vivo. *Neuron* **40**, 563-580.
- Reist, N. E., Werle, M. J. and McMahan, U. J. (1992). Agrin released by motor neurons induces the aggregation of acetylcholine receptors at neuromuscular junctions. *Neuron* **8**, 865-868.
- Reynolds, M. L. and Woolf, C. J. (1992). Terminal Schwann cells elaborate extensive processes following denervation of the motor endplate. *J. Neurocytol.* **21**, 50-66.
- Riethmacher, D., Sonnenberg-Riethmacher, E., Brinkmann, V., Yamaai, T., Lewin, G. R. and Birchmeier, C. (1997). Severe neuropathies in mice with targeted mutations in the ErbB3 receptor. *Nature* **389**, 725-730.
- Rival, T., Soustelle, L., Cattarot, D., Strambi, C., Iche, M. and Birman, S. (2006). Physiological requirement for the glutamate transporter dEAAT1 at the adult Drosophila neuromuscular junction. *J. Neurobiol.* **66**, 1061-1074.
- Roos, J., Hummel, T., Ng, N., Klambt, C. and Davis, G. W. (2000). Drosophila Futsch regulates synaptic microtubule organization and is necessary for synaptic growth. *Neuron* **26**, 371-382.
- Ruegg, M. A. and Bixby, J. L. (1998). Agrin orchestrates synaptic differentiation at the vertebrate neuromuscular junction. *Trends Neurosci.* **21**, 22-27.
- Ruegg, M. A., Tsim, K. W., Horton, S. E., Kroger, S., Escher, G., Gensch, E. M. and McMahan, U. J. (1992). The agrin gene codes for a family of basal lamina proteins that differ in function and distribution. *Neuron* **8**, 691-699.
- Ruggiu, M., Herbst, R., Kim, N., Jevsek, M., Fak, J. J., Mann, M. A., Fischbach, G., Burden, S. J. and Darnell, R. B. (2009). Rescuing Z+ agrin splicing in Nova null mice restores synapse formation and unmasks a physiologic defect in motor neuron firing. *Proc. Natl. Acad. Sci. USA* **106**, 3513-3518.
- Rushton, E., Rohrbough, J. and Broadie, K. (2009). Presynaptic secretion of mind-the-gap organizes the synaptic extracellular matrix-integrin interface and postsynaptic environments. *Dev. Dyn.* **238**, 554-571.
- Saiga, T., Fukuda, T., Matsumoto, M., Tada, H., Okano, H. J., Okano, H. and Nakayama, K. I. (2009). Fbxo45 forms a novel ubiquitin ligase complex and is required for neuronal development. *Mol. Cell Biol.* **29**, 3529-3543.
- Salpeter, M. M. and Loring, R. H. (1985). Nicotinic acetylcholine receptors in vertebrate muscle: properties, distribution and neural control. *Prog. Neurobiol.* **25**, 297-325.
- Salpeter, M. M., Cooper, D. L. and Levitt-Gilmour, T. (1986). Degradation rates of acetylcholine receptors can be modified in the postjunctional plasma membrane of the vertebrate neuromuscular junction. *J. Cell Biol.* **103**, 1399-1403.
- Sanes, J. R. and Lichtman, J. W. (2001). Induction, assembly, maturation and maintenance of a postsynaptic apparatus. *Nat. Rev. Neurosci.* **2**, 791-805.
- Schaeffer, L., de Kerchove d'Exaerde, A. and Changeux, J. P. (2001). Targeting transcription to the neuromuscular synapse. *Neuron* **31**, 15-22.
- Schwander, M., Shirasaki, R., Pfaff, S. L. and Muller, U. (2004). Beta1 integrins in muscle, but not in motor neurons, are required for skeletal muscle innervation. *J. Neurosci.* **24**, 8181-8191.
- Sealock, R., Wray, B. E. and Froehner, S. C. (1984). Ultrastructural localization of the Mr 43,000 protein and the acetylcholine receptor in Torpedo postsynaptic membranes using monoclonal antibodies. *J. Cell Biol.* **98**, 2239-2244.
- Shen, K. and Bargmann, C. I. (2003). The immunoglobulin superfamily protein SYG-1 determines the location of specific synapses in *C. elegans*. *Cell* **112**, 619-630.
- Shen, K., Fetter, R. D. and Bargmann, C. I. (2004). Synaptic specificity is generated by the synaptic guidepost protein SYG-2 and its receptor, SYG-1. *Cell* **116**, 869-881.
- Shi, L., Butt, B., Ip, F. C. F., Dai, Y., Jiang, L., Yung, W. H., Greenberg, M. E., Fu, A. K. Y. and Ip, N. Y. (2010). Ephexin1 is required for structural maturation and neurotransmission at the neuromuscular junction. *Neuron* **65**, 204-216.
- Shull, M. M., Ormsby, I., Kier, A. B., Pawlowski, S., Diebold, R. J., Yin, M., Allen, R., Sidman, C., Proetzel, G., Calvin, D. et al. (1992). Targeted disruption of the mouse transforming growth factor-beta 1 gene results in multifocal inflammatory disease. *Nature* **359**, 693-699.
- Simon-Chazottes, D., Tutois, S., Kuehn, M., Evans, M., Bourgade, F., Cook, S., Davison, M. T. and Guenet, J. L. (2006). Mutations in the gene encoding the low-density lipoprotein receptor LRP4 cause abnormal limb development in the mouse. *Genomics* **87**, 673-677.
- Smith, C. L., Mittaud, P., Prescott, E. D., Fuhrer, C. and Burden, S. J. (2001). Src, Fyn, and Yes are not required for neuromuscular synapse formation but are necessary for stabilization of agrin-induced clusters of acetylcholine receptors. *J. Neurosci.* **21**, 3151-3160.
- Son, Y. J. and Thompson, W. J. (1995a). Nerve sprouting in muscle is induced and guided by processes extended by Schwann cells. *Neuron* **14**, 133-141.
- Son, Y. J. and Thompson, W. J. (1995b). Schwann cell processes guide regeneration of peripheral axons. *Neuron* **14**, 125-132.
- Soosairajah, J., Maiti, S., Wiggan, O., Sarmiere, P., Moussi, N., Sarcevic, B., Sampath, R., Bamburg, J. R. and Bernard, O. (2005). Interplay between components of a novel LIM kinase-slingshot phosphatase complex regulates cofilin. *EMBO J.* **24**, 473-486.
- Stetzkowski-Marden, F., Gaus, K., Recouvreur, M., Cartaud, A. and Cartaud, J. (2006). Agrin elicits membrane lipid condensation at sites of acetylcholine receptor clusters in C2C12 myotubes. *J. Lipid Res.* **47**, 2121-2133.
- Strochlic, L., Cartaud, A., Labas, V., Hoch, W., Rossier, J. and Cartaud, J. (2001). MAGI-1c: a synaptic MAGUK interacting with muSK at the vertebrate neuromuscular junction. *J. Cell Biol.* **153**, 1127-1132.
- Strochlic, L., Cartaud, A., Mejat, A., Grailhe, R., Schaeffer, L., Changeux, J. P. and Cartaud, J. (2004). 14-3-3 gamma associates with muscle specific kinase and regulates synaptic gene transcription at vertebrate neuromuscular synapse. *Proc. Natl. Acad. Sci. USA* **101**, 18189-18194.
- Tang, H., Sun, Z. and Goldman, D. (2001). CaM kinase II-dependent suppression of nicotinic acetylcholine receptor delta-subunit promoter activity. *J. Biol. Chem.* **276**, 26057-26065.
- Ten Dijke, P., Miyazono, K. and Heldin, C. H. (2000). Signaling inputs converge on nuclear effectors in TGF-beta signaling. *Trends Biochem. Sci.* **25**, 64-70.
- Tian, Q. B., Suzuki, T., Yamauchi, T., Sakagami, H., Yoshimura, Y., Miyazawa, S., Nakayama, K., Saitoh, F., Zhang, J. P., Lu, Y. et al. (2006). Interaction of LDL receptor-related protein 4 (LRP4) with postsynaptic scaffold proteins via its C-terminal PDZ domain-binding motif, and its regulation by Ca/calmodulin-dependent protein kinase II. *Eur. J. Neurosci.* **23**, 2864-2876.
- Trachtenberg, J. T. and Thompson, W. J. (1996). Schwann cell apoptosis at developing neuromuscular junctions is regulated by glial growth factor. *Nature* **379**, 174-177.
- Umemori, H. and Sanes, J. R. (2008). Signal regulatory proteins (SIRPs) are secreted presynaptic organizing molecules. *J. Biol. Chem.* **283**, 34053-34061.
- Umemori, H., Linhoff, M. W., Ornitz, D. M. and Sanes, J. R. (2004). FG22 and its close relatives are presynaptic organizing molecules in the mammalian brain. *Cell* **118**, 257-270.
- Valenzuela, D. M., Stitt, T. N., DiStefano, P. S., Rojas, E., Mattsson, K., Compton, D. L., Nunez, L., Park, J. S., Stark, J. L., Gies, D. R. et al. (1995). Receptor tyrosine kinase specific for the skeletal muscle lineage: expression in embryonic muscle, at the neuromuscular junction, and after injury. *Neuron* **15**, 573-584.
- Vock, V. M., Ponomareva, O. N. and Rimer, M. (2008). Evidence for muscle-dependent neuromuscular synaptic site determination in mammals. *J. Neurosci.* **28**, 3123-3130.
- Wang, C. Y., Yang, F., He, X. P., Je, H. S., Zhou, J. Z., Eckermann, K., Kawamura, D., Feng, L., Shen, L. and Lu, B. (2002). Regulation of neuromuscular synapse development by glial cell line-derived neurotrophic factor and neurturin. *J. Biol. Chem.* **277**, 10614-10625.
- Wang, J., Jing, Z., Zhang, L., Zhou, G., Braun, J., Yao, Y. and Wang, Z. Z. (2003). Regulation of acetylcholine receptor clustering by the tumor suppressor APC. *Nat. Neurosci.* **6**, 1017-1018.
- Wang, J., Ruan, N. J., Qian, L., Lei, W. L., Chen, F. and Luo, Z. G. (2008). Wnt/beta-catenin signaling suppresses Rapsyn expression and inhibits acetylcholine receptor clustering at the neuromuscular junction. *J. Biol. Chem.* **283**, 21668-21675.
- Wang, P., Yang, G., Mosier, D. R., Chang, P., Zaidi, T., Gong, Y. D., Zhao, N. M., Dominguez, B., Lee, K. F., Gan, W. B. et al. (2005). Defective neuromuscular synapses in mice lacking amyloid precursor protein (APP) and APP-like protein 2. *J. Neurosci.* **25**, 1219-1225.
- Wang, Q., Zhang, B., Wang, Y. E., Xiong, W. C. and Mei, L. (2008). The Ig1/2 domain of MuSK binds to muscle surface and is involved in acetylcholine receptor clustering. *Neurosignals* **16**, 246-253.



- Watanabe, T., Wang, S., Noritake, J., Sato, K., Fukata, M., Takefuji, M., Nakagawa, M., Izumi, N., Akiyama, T. and Kaibuchi, K. (2004). Interaction with IQGAP1 links APC to Rac1, Cdc42, and actin filaments during cell polarization and migration. *Dev. Cell* **7**, 871-883.
- Weatherbee, S. D., Anderson, K. V. and Niswander, L. A. (2006). LDL-receptor-related protein 4 is crucial for formation of the neuromuscular junction. *Development* **133**, 4993-5000.
- Webb, B. A., Zhou, S., Eves, R., Shen, L., Jia, L. and Mak, A. S. (2006). Phosphorylation of cortactin by p21-activated kinase. *Arch. Biochem. Biophys.* **456**, 183-193.
- Weston, C., Yee, B., Hod, E. and Prives, J. (2000). Agrin-induced Acetylcholine Receptor Clustering Is Mediated by the Small Guanosine Triphosphatases Rac and Cdc42. *J. Cell Biol.* **150**, 205-212.
- Weston, C., Gordon, C., Teresa, G., Hod, E., Ren, X. D. and Prives, J. (2003). Cooperative regulation by Rac and Rho of agrin-induced acetylcholine receptor clustering in muscle cells. *J. Biol. Chem.* **278**, 6450-6455.
- Willmann, R., Pun, S., Stallmach, L., Sadasivam, G., Santos, A. F., Caroni, P. and Fuhrer, C. (2006). Cholesterol and lipid microdomains stabilize the postsynapse at the neuromuscular junction. *EMBO J.* **25**, 4050-4060.
- Woldeyesus, M. T., Britsch, S., Riethmacher, D., Xu, L., Sonnenberg-Riethmacher, E., Abou-Rebyeh, F., Harvey, R., Caroni, P. and Birchmeier, C. (1999). Peripheral nervous system defects in erbB2 mutants following genetic rescue of heart development. *Genes Dev.* **13**, 2538-2548.
- Wolpowitz, D., Mason, T. B., Dietrich, P., Mendelsohn, M., Talmage, D. A. and Role, L. W. (2000). Cysteine-rich domain isoforms of the neuregulin-1 gene are required for maintenance of peripheral synapses. *Neuron* **25**, 79-91.
- Yamaguchi, Y. L., Tanaka, S. S., Kasa, M., Yasuda, K., Tam, P. P. and Matsui, Y. (2006). Expression of low density lipoprotein receptor-related protein 4 (Lrp4) gene in the mouse germ cells. *Gene Expr. Patterns* **6**, 607-612.
- Yang, X., Li, W., Prescott, E. D., Burden, S. J. and Wang, J. C. (2000). DNA topoisomerase IIbeta and neural development. *Science* **287**, 131-134.
- Yang, X., Arber, S., William, C., Li, L., Tanabe, Y., Jessell, T. M., Birchmeier, C. and Burden, S. J. (2001). Patterning of muscle acetylcholine receptor gene expression in the absence of motor innervation. *Neuron* **30**, 399-410.
- Yuan, L. L. and Ganetzky, B. (1999). A glial-neuronal signaling pathway revealed by mutations in a neuroligin-related protein. *Science* **283**, 1343-1345.
- Yumoto, N., Wakatsuki, S., Kurisaki, T., Hara, Y., Osumi, N., Frisen, J. and Sehara-Fujisawa, A. (2008). Meltrin beta/ADAM19 interacting with EphA4 in developing neural cells participates in formation of the neuromuscular junction. *PLoS ONE* **3**, e3322.
- Zhang, B., Luo, S., Dong, X. P., Zhang, X., Liu, C., Luo, Z., Xiong, W. C. and Mei, L. (2007). Beta-catenin regulates acetylcholine receptor clustering in muscle cells through interaction with rapsyn. *J. Neurosci.* **27**, 3968-3973.
- Zhang, B., Luo, S., Wang, Q., Suzuki, T., Xiong, W. C. and Mei, L. (2008). LRP4 serves as a coreceptor of agrin. *Neuron* **60**, 285-297.
- Zhang, J., Lefebvre, J. L., Zhao, S. and Granato, M. (2004). Zebrafish unplugged reveals a role for muscle-specific kinase homologs in axonal pathway choice. *Nat. Neurosci.* **7**, 1303-1309.
- Zhang, X., Xu, R., Zhu, B., Yang, X., Ding, X., Duan, S., Xu, T., Zhuang, Y. and Han, M. (2007). Syne-1 and Syne-2 play crucial roles in myonuclear anchorage and motor neuron innervation. *Development* **134**, 901-908.
- Zhou, H., Glass, D. J., Yancopoulos, G. D. and Sanes, J. R. (1999). Distinct domains of MuSK mediate its abilities to induce and to associate with postsynaptic specializations. *J. Cell Biol.* **146**, 1133-1146.
- Zhu, D., Xiong, W. C. and Mei, L. (2006). Lipid rafts serve as a signaling platform for nicotinic acetylcholine receptor clustering. *J. Neurosci.* **26**, 4841-4851.
- Zhu, D., Yang, Z., Luo, Z., Luo, S., Xiong, W. C. and Mei, L. (2008). Muscle-specific receptor tyrosine kinase endocytosis in acetylcholine receptor clustering in response to agrin. *J. Neurosci.* **28**, 1688-1696.
- Ziskind-Conhaim, L. and Bennett, J. I. (1982). The effects of electrical inactivity and denervation on the distribution of acetylcholine receptors in developing rat muscle. *Dev. Biol.* **90**, 185-197.
